# Supplementary material for: Sensitive LC-MS/MS Methods for Amphotericin B Analysis in Cerebrospinal Fluid, Plasma, Plasma Ultrafiltrate, and Urine: Application to Clinical Pharmacokinetics
Source: Front Chem. 2021 Nov 29;9:782131. doi: 10.3389/fchem.2021.782131 (PMC8666623; doi:10.3389/fchem.2021.782131)
Supplement: Supplementary file 1 [file DataSheet1.XLSX]

## Sheet: Plasma validation
Plasma validation
Matrix Effect
Sample	Standard concentration (ng/mL)	RT	Concentration (ng/mL)	Analyte area	Internal standard area	IS RT	Height	IS Height	RRF	Response	Signal/Noise		Analyte area / internal standard area	Matrix Factor Normalized by Internal Standard		Matrix Factor Normalized by Internal Standard
LCQC plasma (normal #1)	10	3.23		4155.22	297461	2.24	20944	2609237	0.0014	0.014	138.789		0.0139689	1.71421		Mean =	1.57676
LCQC plasma (normal #2)	10	3.23		3683.53	258188	2.24	17410	2284995	0.00143	0.0143	118.328		0.0142668	1.75077		Standard Deviation =	0.131208
LCQC plasma (normal #3)	10	3.23		4288.9	314267	2.25	21243	2753495	0.00136	0.0136	148.316		0.0136473	1.67474		Coefficient of Variation (%) =	8.32135
LCQC plasma (normal #4)	10	3.2		4245.78	301439	2.24	21120	2680991	0.00141	0.0141	179.769		0.014085	1.72846
LCQC plasma (lipemic #1)	10	3.21		4158.2	316864	2.24	21067	2777891	0.00131	0.0131	142.057		0.013123	1.6104
LCQC plasma (lipemic #2)	10	3.21		4017.65	321816	2.25	20300	2785125	0.00125	0.0125	207.482		0.0124843	1.53202
LCQC plasma (hemolyzed #1)	10	3.21		4128.43	302002	2.24	20111	2672320	0.00137	0.0137	174.063		0.0136702	1.67755
LCQC plasma (hemolyzed #2)	10	3.21		4199.59	290780	2.24	20628	2583930	0.00144	0.0144	167.908		0.0144425	1.77233
LCQC solution	10	3.26		3784.86	495823	2.25	18241	4432776	0.00076	0.0076	191.411		0.00763349
LCQC solution	10	3.26		3839.64	464573	2.25	19332	4123388	0.00083	0.0083	102.124		0.00826488
LCQC solution	10	3.26		4077.9	477039	2.25	20123	4171922	0.00085	0.0085	113.546		0.00854835
HCQC plasma (normal #1)	800	3.23		329646	327397	2.24	1656966	2874153	0.00126	1.0069	7823.01		1.00687	1.40913
HCQC plasma (normal #2)	800	3.23		346916	333688	2.24	1732243	2950338	0.0013	1.0396	9985.58		1.03964	1.455
HCQC plasma (normal #3)	800	3.23		339994	318125	2.25	1705500	2786259	0.00134	1.0687	7612.9		1.06874	1.49573
HCQC plasma (normal #4)	800	3.2		338194	316977	2.24	1685299	2807417	0.00133	1.0669	8214.5		1.06693	1.4932
HCQC plasma (lipemic #1)	800	3.21		341465	317894	2.24	1721800	2811907	0.00134	1.0741	3861.02		1.07415	1.50329
HCQC plasma (lipemic #2)	800	3.21		358853	359307	2.24	1807491	3187889	0.00125	0.9987	9074.28		0.998736	1.39775
HCQC plasma (hemolyzed #1)	800	3.21		349962	304261	2.24	1745521	2697303	0.00144	1.1502	7317.26		1.1502	1.60974
HCQC plasma (hemolyzed #2)	800	3.2		330657	329644	2.24	1648232	2906305	0.00125	1.0031	5872.18		1.00307	1.40382
HCQC solution	800	3.27		338762	476949	2.25	1668441	4260576	0.00089	0.7103	4974.91		0.71027
HCQC solution	800	3.26		344394	467341	2.25	1694917	4152380	0.00092	0.7369	5822.29		0.736921
HCQC solution	800	3.27		345260	495779	2.25	1703689	4393777	0.00087	0.6964	2595.69		0.6964
Precision and Accuracy
Within-run
Sample	Standard concentration (ng/mL)	RT	Concentration (ng/mL)	Analyte area	Internal standard area	IS RT	Height	IS Height	RRF	Response	Signal/Noise					Within-run Precision (CV, %) and Accuracy (RE, %)
Run 1 – LLOQQC plasma	5	3.18	4.853	2345.52	261223	2.24	10932	2389887	0.0018	0.009	84.325					LLOQQC
Run 1 – LLOQQC plasma	5	3.18	4.837	2314.21	258229	2.24	11767	2300596	0.00179	0.009	81.947					Mean =	5.249
Run 1 – LLOQQC plasma	5	3.18	5.525	2531.86	260425	2.24	12353	2366253	0.00194	0.0097	122.84					Standard Deviation =	0.373072
Run 1 – LLOQQC plasma	5	3.18	5.436	2447.89	254378	2.24	11932	2300813	0.00192	0.0096	104.31					Precision (Coefficient of Variation, %) =	7.10748
Run 1 – LLOQQC plasma	5	3.19	5.594	2583.65	263685	2.24	12485	2374216	0.00196	0.0098	86.382					Accuracy (Relative Error, %) =	4.98
Run 1 – LCQC plasma	10	3.18	10.155	3633.17	244870	2.24	18359	2209783	0.00148	0.0148	123.681					LCQC
Run 1 – LCQC plasma	10	3.18	10.21	3731.79	250486	2.24	18313	2254184	0.00149	0.0149	118.701					Mean =	10.0878
Run 1 – LCQC plasma	10	3.18	9.999	3784.52	258055	2.24	18525	2342315	0.00147	0.0147	76.076					Standard Deviation =	0.221029
Run 1 – LCQC plasma	10	3.18	10.323	3631.73	241745	2.24	18204	2249214	0.0015	0.015	134.581					Precision (Coefficient of Variation, %) =	2.19105
Run 1 – LCQC plasma	10	3.18	9.752	3600.81	250186	2.24	18012	2333168	0.00144	0.0144	166.141					Accuracy (Relative Error, %) =	0.878
Run 1 – MCQC plasma	500	3.18	504.199	139702	249144	2.24	701471	2284755	0.00112	0.5607	2373.53					MCQC
Run 1 – MCQC plasma	500	3.18	490.383	143099	262343	2.24	711604	2376372	0.00109	0.5455	1663					Mean =	497.927
Run 1 – MCQC plasma	500	3.18	493.585	140775	256421	2.24	701375	2393220	0.0011	0.549	1926.68					Standard Deviation =	8.12488
Run 1 – MCQC plasma	500	3.18	508.895	146068	258108	2.24	729668	2369555	0.00113	0.5659	3666.58					Precision (Coefficient of Variation, %) =	1.63174
Run 1 – MCQC plasma	500	3.18	492.574	134279	245086	2.24	676509	2255379	0.0011	0.5479	8991.6					Accuracy (Relative Error, %) =	-0.41456
Run 1 – HCQC plasma	800	3.19	813.753	231688	256641	2.24	1169811	2341771	0.00113	0.9028	4518.11					HCQC
Run 1 – HCQC plasma	800	3.19	786.318	217073	248807	2.24	1088198	2350892	0.00109	0.8725	6689.6					Mean =	793.873
Run 1 – HCQC plasma	800	3.18	775.848	217930	253145	2.24	1091007	2346682	0.00108	0.8609	3743.78					Standard Deviation =	17.9329
Run 1 – HCQC plasma	800	3.19	812.422	231923	257321	2.24	1163997	2403366	0.00113	0.9013	5923.04					Precision (Coefficient of Variation, %) =	2.25891
Run 1 – HCQC plasma	800	3.18	781.024	217707	251218	2.24	1096054	2290360	0.00108	0.8666	3352.15					Accuracy (Relative Error, %) =	-0.765875
Run 1 – DQC plasma	500	3.21	473.095	145321	245741	2.24	715939	2261233	0.00118	0.5914	4245.14					DQC
Run 1 – DQC plasma	500	3.2	482.151	151668	251664	2.24	746287	2335811	0.00121	0.6027	3180.72					Mean =	479.474
Run 1 – DQC plasma	500	3.21	483.917	155236	256645	2.24	768842	2384962	0.00121	0.6049	2414.6					Standard Deviation =	11.7613
Run 1 – DQC plasma	500	3.2	494.683	149454	241714	2.24	741821	2301262	0.00124	0.6183	1637.19					Precision (Coefficient of Variation, %) =	2.45296
Run 1 – DQC plasma	500	3.21	463.524	153087	264213	2.24	756285	2461517	0.00116	0.5794	3660.66					Accuracy (Relative Error, %) =	-4.1052
Between-run
Sample	Standard concentration (ng/mL)	RT	Concentration (ng/mL)	Analyte area	Internal standard area	IS RT	Height	IS Height	RRF	Response	Signal/Noise					Between-run Precision (CV, %) and Accuracy (RE, %)
Run 1 – LLOQQC plasma	5	3.18	4.853	2345.52	261223	2.24	10932	2389887	0.0018	0.009	84.325					LLOQQC
Run 1 – LLOQQC plasma	5	3.18	4.837	2314.21	258229	2.24	11767	2300596	0.00179	0.009	81.947					Mean =	4.93647
Run 1 – LLOQQC plasma	5	3.18	5.525	2531.86	260425	2.24	12353	2366253	0.00194	0.0097	122.84					Standard Deviation =	0.442648
Run 1 – LLOQQC plasma	5	3.18	5.436	2447.89	254378	2.24	11932	2300813	0.00192	0.0096	104.31					Precision (Coefficient of Variation, %) =	8.9669
Run 1 – LLOQQC plasma	5	3.19	5.594	2583.65	263685	2.24	12485	2374216	0.00196	0.0098	86.382					Accuracy (Relative Error, %) =	-1.27067
Run 2 – LLOQQC plasma	5	3.2	4.575	2088.18	222658	2.24	10148	2008714	0.00188	0.0094	87.341
Run 2 – LLOQQC plasma	5	3.19	5.16	2180.87	217056	2.23	10391	2021912	0.00201	0.01	54.722
Run 2 – LLOQQC plasma	5	3.19	5.655	2329.8	219515	2.24	10989	2012250	0.00212	0.0106	89.986
Run 2 – LLOQQC plasma	5	3.19	5.079	2074.33	208378	2.23	10318	1886276	0.00199	0.01	192.932
Run 2 – LLOQQC plasma	5	3.2	4.354	2193.74	240390	2.24	10569	2154872	0.00183	0.0091	142.037
Run 3 – LLOQQC plasma	5	3.21	4.588	1638.22	225926	2.24	7378	2137885	0.00145	0.0073	32.815
Run 3 – LLOQQC plasma	5	3.19	4.534	1596.62	222300	2.24	7837	2095244	0.00144	0.0072	37.218
Run 3 – LLOQQC plasma	5	3.2	4.58	1592.81	219978	2.24	7553	2062662	0.00145	0.0072	28.601
Run 3 – LLOQQC plasma	5	3.21	4.475	1517.21	213462	2.24	7663	2017788	0.00142	0.0071	59.749
Run 3 – LLOQQC plasma	5	3.2	4.802	1668.38	221787	2.24	7931	2086623	0.0015	0.0075	32.186
Run 1 – LCQC plasma	10	3.18	10.155	3633.17	244870	2.24	18359	2209783	0.00148	0.0148	123.681					LCQC
Run 1 – LCQC plasma	10	3.18	10.21	3731.79	250486	2.24	18313	2254184	0.00149	0.0149	118.701					Mean =	10.1612
Run 1 – LCQC plasma	10	3.18	9.999	3784.52	258055	2.24	18525	2342315	0.00147	0.0147	76.076					Standard Deviation =	0.484438
Run 1 – LCQC plasma	10	3.18	10.323	3631.73	241745	2.24	18204	2249214	0.0015	0.015	134.581					Precision (Coefficient of Variation, %) =	4.76753
Run 1 – LCQC plasma	10	3.18	9.752	3600.81	250186	2.24	18012	2333168	0.00144	0.0144	166.141					Accuracy (Relative Error, %) =	1.612
Run 2 – LCQC plasma	10	3.2	11.28	3362.31	197227	2.23	16299	1767850	0.0017	0.017	179.526
Run 2 – LCQC plasma	10	3.19	10.241	3488.44	219960	2.23	17187	1995856	0.00159	0.0159	144.839
Run 2 – LCQC plasma	10	3.19	10.348	3586.84	224422	2.23	17090	2065833	0.0016	0.016	158.038
Run 2 – LCQC plasma	10	3.19	9.977	3481.01	223744	2.23	17551	2018412	0.00156	0.0156	290.942
Run 2 – LCQC plasma	10	3.19	10.734	3782.74	230323	2.23	18339	2094044	0.00164	0.0164	171.031
Run 3 – LCQC plasma	10	3.2	9.777	2896.63	209286	2.24	13937	1995496	0.00138	0.0138	127.548
Run 3 – LCQC plasma	10	3.2	9.424	2960.76	221072	2.24	13962	2089749	0.00134	0.0134	99.698
Run 3 – LCQC plasma	10	3.19	9.589	2871.09	211077	2.24	14038	1995202	0.00136	0.0136	50.242
Run 3 – LCQC plasma	10	3.2	9.887	2929.21	209514	2.24	13606	2015372	0.0014	0.014	106.457
Run 3 – LCQC plasma	10	3.19	10.722	3014.12	200392	2.24	15181	1926722	0.0015	0.015	95.096
Run 1 – MCQC plasma	500	3.18	504.199	139702	249144	2.24	701471	2284755	0.00112	0.5607	2373.53					MCQC
Run 1 – MCQC plasma	500	3.18	490.383	143099	262343	2.24	711604	2376372	0.00109	0.5455	1663					Mean =	498.777
Run 1 – MCQC plasma	500	3.18	493.585	140775	256421	2.24	701375	2393220	0.0011	0.549	1926.68					Standard Deviation =	28.3708
Run 1 – MCQC plasma	500	3.18	508.895	146068	258108	2.24	729668	2369555	0.00113	0.5659	3666.58					Precision (Coefficient of Variation, %) =	5.68808
Run 1 – MCQC plasma	500	3.18	492.574	134279	245086	2.24	676509	2255379	0.0011	0.5479	8991.6					Accuracy (Relative Error, %) =	-0.244613
Run 2 – MCQC plasma	500	3.19	491.713	123660	218242	2.23	616107	1978848	0.00113	0.5666	2064.59
Run 2 – MCQC plasma	500	3.19	530.316	138581	226893	2.23	694134	2080794	0.00122	0.6108	2569.45
Run 2 – MCQC plasma	500	3.19	552.483	137180	215646	2.23	683594	1958831	0.00127	0.6361	2349.08
Run 2 – MCQC plasma	500	3.19	552.097	141920	223253	2.23	706126	2013399	0.00127	0.6357	2923.97
Run 2 – MCQC plasma	500	3.19	488.844	122863	218099	2.23	607033	1977080	0.00113	0.5633	3276.99
Run 3 – MCQC plasma	500	3.2	472.362	128718	214060	2.24	645646	2063966	0.0012	0.6013	5247.91
Run 3 – MCQC plasma	500	3.2	454.41	130363	225339	2.24	647488	2137010	0.00116	0.5785	4501.46
Run 3 – MCQC plasma	500	3.2	464.237	131775	222971	2.24	656533	2148068	0.00118	0.591	2335.27
Run 3 – MCQC plasma	500	3.2	482.798	133331	216950	2.24	666271	2051359	0.00123	0.6146	2173.11
Run 3 – MCQC plasma	500	3.2	502.758	138296	216115	2.24	692026	2030454	0.00128	0.6399	3803.44
Run 1 – HCQC plasma	800	3.19	813.753	231688	256641	2.24	1169811	2341771	0.00113	0.9028	4518.11					HCQC
Run 1 – HCQC plasma	800	3.19	786.318	217073	248807	2.24	1088198	2350892	0.00109	0.8725	6689.6					Mean =	787.683
Run 1 – HCQC plasma	800	3.18	775.848	217930	253145	2.24	1091007	2346682	0.00108	0.8609	3743.78					Standard Deviation =	33.4667
Run 1 – HCQC plasma	800	3.19	812.422	231923	257321	2.24	1163997	2403366	0.00113	0.9013	5923.04					Precision (Coefficient of Variation, %) =	4.24876
Run 1 – HCQC plasma	800	3.18	781.024	217707	251218	2.24	1096054	2290360	0.00108	0.8666	3352.15					Accuracy (Relative Error, %) =	-1.53966
Run 2 – HCQC plasma	800	3.19	793.519	205951	225859	2.23	1030119	2169504	0.00114	0.9119	7604.14
Run 2 – HCQC plasma	800	3.19	822.422	221757	234683	2.23	1104384	2213437	0.00118	0.9449	5803.6
Run 2 – HCQC plasma	800	3.19	816.479	218440	232849	2.23	1088641	2145615	0.00117	0.9381	2803.59
Run 2 – HCQC plasma	800	3.19	805.42	220707	238481	2.23	1099863	2201418	0.00116	0.9255	2626.86
Run 2 – HCQC plasma	800	3.19	837.276	226738	235716	2.23	1132909	2166718	0.0012	0.9619	3753.64
Run 3 – HCQC plasma	800	3.2	777.261	250822	231209	2.24	1228228	2221209	0.00136	1.0848	3019.58
Run 3 – HCQC plasma	800	3.2	788.448	249353	226599	2.24	1223001	2171015	0.00138	1.1004	1992.05
Run 3 – HCQC plasma	800	3.2	738.685	246013	238594	2.24	1201799	2275884	0.00129	1.0311	3806.77
Run 3 – HCQC plasma	800	3.2	711.879	235249	236726	2.24	1148253	2216600	0.00124	0.9938	4116.2
Run 3 – HCQC plasma	800	3.2	754.487	238189	226178	2.24	1162557	2120639	0.00132	1.0531	6406.49
Run 1 – DQC plasma	500	3.21	473.095	145321	245741	2.24	715939	2261233	0.00118	0.5914	4245.14					DQC
Run 1 – DQC plasma	500	3.2	482.151	151668	251664	2.24	746287	2335811	0.00121	0.6027	3180.72					Mean =	503.145
Run 1 – DQC plasma	500	3.21	483.917	155236	256645	2.24	768842	2384962	0.00121	0.6049	2414.6					Standard Deviation =	26.1831
Run 1 – DQC plasma	500	3.2	494.683	149454	241714	2.24	741821	2301262	0.00124	0.6183	1637.19					Precision (Coefficient of Variation, %) =	5.20389
Run 1 – DQC plasma	500	3.21	463.524	153087	264213	2.24	756285	2461517	0.00116	0.5794	3660.66					Accuracy (Relative Error, %) =	0.629013
Run 2 – DQC plasma	500	3.21	524.431	183244	257839	2.24	907910	2424937	0.00142	0.7107	5155.87
Run 2 – DQC plasma	500	3.21	485.528	159144	241856	2.23	787448	2249496	0.00132	0.658	4231.38
Run 2 – DQC plasma	500	3.21	489.29	155784	234932	2.23	768519	2210876	0.00133	0.6631	2714.95
Run 2 – DQC plasma	500	3.21	481.031	154954	237689	2.23	761412	2228030	0.0013	0.6519	3565.74
Run 2 – DQC plasma	500	3.21	505.255	159657	233171	2.23	786839	2167225	0.00137	0.6847	3406.98
Run 3 – DQC plasma	500	3.21	530.89	160345	255667	2.23	785158	2340035	0.00125	0.6272	3847.23
Run 3 – DQC plasma	500	3.21	521.22	155345	252285	2.23	770698	2307482	0.00123	0.6158	5106.19
Run 3 – DQC plasma	500	3.21	535.609	162923	257492	2.23	806156	2353796	0.00127	0.6327	4970.57
Run 3 – DQC plasma	500	3.21	547.636	160567	248200	2.23	793298	2318702	0.00129	0.6469	2904.76
Run 3 – DQC plasma	500	3.21	528.916	152532	244115	2.23	753673	2250031	0.00125	0.6248	3390.28
Stabilities
Freeze and thaw
Sample	Standard concentration (ng/mL)	RT	Concentration (ng/mL)	Analyte area	Internal standard area	IS RT	Height	IS Height	RRF	Response	Signal/Noise					Freeze and thaw stability Precision (CV, %) and Accuracy (RE, %)
LCQC plasma	10	3.21	8.913	2913.97	229908	2.23	13789	1866764	0.00127	0.0127	98.689					LCQC
LCQC plasma	10	3.23	9.32	3357.3	253706	2.24	15816	2049350	0.00132	0.0132	126.631					Mean =	9.1376
LCQC plasma	10	3.23	8.856	3056.35	242651	2.24	14559	1988502	0.00126	0.0126	191.218					Standard Deviation =	0.517098
LCQC plasma	10	3.23	8.646	3008.86	244484	2.24	14578	2004655	0.00123	0.0123	155.699					Precision (Coefficient of Variation, %) =	5.65901
LCQC plasma	10	3.21	9.953	3425.41	242878	2.24	16465	1981127	0.00141	0.0141	139.189					Accuracy (Relative Error, %) =	-8.624
HCQC plasma	800	3.23	742.285	235152	230284	2.23	1117259	1878129	0.00128	1.0211	3394.85					HCQC
HCQC plasma	800	3.23	680.803	229619	245163	2.24	1087287	1951058	0.00117	0.9366	4807.25					Mean =	704.68
HCQC plasma	800	3.23	723.16	220644	221789	2.24	1051203	1810254	0.00124	0.9948	5101.23					Standard Deviation =	26.6663
HCQC plasma	800	3.23	688.577	228744	241473	2.23	1089260	1962154	0.00118	0.9473	5008.62					Precision (Coefficient of Variation, %) =	3.78417
HCQC plasma	800	3.23	688.577	228744	241473	2.23	1089260	1962154	0.00118	0.9473	5008.62					Accuracy (Relative Error, %) =	-11.915
Short-term temperature
Sample	Standard concentration (ng/mL)	RT	Concentration (ng/mL)	Analyte area	Internal standard area	IS RT	Height	IS Height	RRF	Response	Signal/Noise					Short-term temperature stability Precision (CV, %) and Accuracy (RE, %)
LCQC plasma	10	3.2	10.475	3162.72	241463	2.23	14879	2224512	0.00131	0.0131	105.194					LCQC
LCQC plasma	10	3.21	10.462	3296.24	251948	2.23	15975	2331599	0.00131	0.0131	198.592					Mean =	10.608
LCQC plasma	10	3.23	10.557	3448.42	261339	2.23	16754	2385423	0.00132	0.0132	174.699					Standard Deviation =	0.260995
LCQC plasma	10	3.21	11.07	3377.76	244745	2.23	15956	2251968	0.00138	0.0138	106.301					Precision (Coefficient of Variation, %) =	2.46036
LCQC plasma	10	3.21	10.476	3378.58	257903	2.24	16856	2352418	0.00131	0.0131	108.424					Accuracy (Relative Error, %) =	6.08
HCQC plasma	800	3.21	780.226	216230	234683	2.23	1059490	2138582	0.00115	0.9214	5216.13					HCQC
HCQC plasma	800	3.21	818.136	233996	242207	2.23	1142029	2177210	0.00121	0.9661	2384.83					Mean =	814.965
HCQC plasma	800	3.21	836.481	231676	234550	2.23	1132447	2213573	0.00123	0.9877	6300.57					Standard Deviation =	22.7935
HCQC plasma	800	3.21	806.804	238728	250572	2.23	1173135	2312550	0.00119	0.9527	5351.52					Precision (Coefficient of Variation, %) =	2.79687
HCQC plasma	800	3.21	833.18	240149	244090	2.23	1166861	2264750	0.00123	0.9839	4428.67					Accuracy (Relative Error, %) =	1.87067
Post-preparative
Sample	Standard concentration (ng/mL)	RT	Concentration (ng/mL)	Analyte area	Internal standard area	IS RT	Height	IS Height	RRF	Response	Signal/Noise					Short-term temperature stability Precision (CV, %) and Accuracy (RE, %)
LCQC plasma	10	3.18	10.29	4027.5	260930	2.24	19797	2398244	0.00154	0.0154	142.825					LCQC
LCQC plasma	10	3.18	9.371	4030.25	280798	2.24	20212	2534571	0.00144	0.0144	82.533					Mean =	9.7922
LCQC plasma	10	3.18	10.412	3950.23	253567	2.24	20259	2416158	0.00156	0.0156	124.101					Standard Deviation =	0.548681
LCQC plasma	10	3.18	9.72	3814.36	258365	2.24	18824	2449967	0.00148	0.0148	161.399					Precision (Coefficient of Variation, %) =	5.60325
LCQC plasma	10	3.18	9.168	3711.3	262945	2.24	18504	2408539	0.00141	0.0141	141.3					Accuracy (Relative Error, %) =	-2.078
HCQC plasma	800	3.19	725.487	222679	259728	2.24	1126394	2380176	0.00107	0.8574	3861.44					HCQC
HCQC plasma	800	3.19	723.602	221526	259053	2.24	1121584	2432345	0.00107	0.8551	4183.49					Mean =	712.746
HCQC plasma	800	3.18	698.719	217805	263736	2.24	1090748	2427760	0.00103	0.8258	6425.15					Standard Deviation =	11.4317
HCQC plasma	800	3.19	707.868	250679	299634	2.24	1256042	2762792	0.00105	0.8366	3693.53					Precision (Coefficient of Variation, %) =	1.60389
HCQC plasma	800	3.19	708.056	218756	261408	2.24	1102379	2434613	0.00105	0.8368	3387.53					Accuracy (Relative Error, %) =	-10.9067

## Sheet: Plasma ultrafiltrate validation
Plasma ultrafiltrate validation
Matrix Effect
Sample	Standard concentration (ng/mL)	RT	Concentration (ng/mL)	Analyte area	Internal standard area	IS RT	Height	IS Height	RRF	Response	Signal/Noise		Analyte area / internal standard area	Matrix Factor Normalized by Internal Standard		Matrix Factor Normalized by Internal Standard
LCQC plasma ultrafiltrate (normal #1)	1	3.11	1.031	806	370314	3.12	4066	2699428	0.218	0.22	30.746		0.00217653	1.0812		Mean =	1.41041
LCQC plasma ultrafiltrate (normal #2)	1	3.11	1.049	786	345862	3.12	3926	2543289	0.227	0.23	12.891		0.00227258	1.12891		Standard Deviation =	0.177689
LCQC plasma ultrafiltrate (normal #3)	1	3.13	1.142	987	357136	3.12	5603	2626407	0.276	0.28	36.153		0.00276365	1.37285		Coefficient of Variation (%) =	12.5984
LCQC plasma ultrafiltrate (normal #4)	1	2.95	1.278	1145	329288	3.12	4637	2415106	0.348	0.35	29.087		0.0034772	1.7273
LCQC plasma ultrafiltrate (lipemic #1)	1	2.96	1.217	1019	322751	3.12	3664	2380314	0.316	0.32	26.199		0.00315723	1.56836
LCQC plasma ultrafiltrate (lipemic #2)	1	2.94	1.089	835	335893	3.12	3915	2471506	0.249	0.25	26.357		0.00248591	1.23488
LCQC plasma ultrafiltrate (hemolyzed #1)	1	2.9	1.067	812	343081	3.12	3280	2533500	0.237	0.24	4.487		0.00236679	1.17571
LCQC plasma ultrafiltrate (hemolyzed #2)	1	2.95	1.159	962	337030	3.13	4641	2488224	0.285	0.29	27.388		0.00285435	1.4179
LCQC solution	1	3.16	0.93	783	475685	3.13	4677	3385161	0.165	0.16	22.642		0.00164605
LCQC solution	1	3.17	0.968	895	485394	3.13	4766	3461980	0.184	0.18	33.497		0.00184386
LCQC solution	1	3.18	1.01	1081	523788	3.13	5689	3743013	0.206	0.21	25.858		0.00206381
LCQC solution	1	3.19	1.077	1231	508319	3.13	5986	3646492	0.242	0.24	30.641		0.00242171
LCQC solution	1	3.19	1.014	1061	507665	3.13	4953	3650541	0.209	0.21	20.962		0.00208996
HCQC plasma ultrafiltrate (normal #1)	80	3.12	122.452	234526	364757	3.13	1037580	2685173	0.804	64.3	4211.27		0.642965	1.53479
HCQC plasma ultrafiltrate (normal #2)	80	3.12	128.001	215273	320229	3.12	955191	2349485	0.84	67.22	2796.71		0.672247	1.60469
HCQC plasma ultrafiltrate (normal #3)	80	3.13	114.891	204807	339611	3.13	899380	2511904	0.754	60.31	1465.48		0.603064	1.43954
HCQC plasma ultrafiltrate (normal #4)	80	2.94	122.844	212080	328790	3.12	874589	2413738	0.806	64.5	2041.75		0.645032	1.53972
HCQC plasma ultrafiltrate (lipemic #1)	80	2.95	114.582	200644	333612	3.12	804568	2454704	0.752	60.14	2576.51		0.601429	1.43564
HCQC plasma ultrafiltrate (lipemic #2)	80	2.95	114.437	202791	337611	3.12	818202	2481556	0.751	60.07	4080.6		0.600665	1.43382
HCQC plasma ultrafiltrate (hemolyzed #1)	80	2.94	114.713	195464	324626	3.12	783928	2387217	0.753	60.21	2577.8		0.602121	1.43729
HCQC plasma ultrafiltrate (hemolyzed #2)	80	2.95	114.442	199590	332266	3.12	811756	2455305	0.751	60.07	1119.84		0.600693	1.43389
HCQC solution	80	3.19	92.665	261043	537388	3.13	1212060	3947122	0.607	48.58	1989.88		0.485763
HCQC solution	80	3.2	82.389	250720	580993	3.12	1172830	4264980	0.539	43.15	635.696		0.431537
HCQC solution	80	3.19	72.987	230572	603724	3.13	1070858	4425517	0.477	38.19	2437.72		0.381916
HCQC solution	80	3.19	76.554	245764	613273	3.13	1148143	4479231	0.501	40.07	2589.05		0.400742
HCQC solution	80	3.19	75.405	235004	595432	3.12	1097457	4367023	0.493	39.47	4200.26		0.394678
Precision and Accuracy
Within-run
Sample	Standard concentration (ng/mL)	RT	Concentration (ng/mL)	Analyte area	Internal standard area	IS RT	Height	IS Height	RRF	Response	Signal/Noise					Within-run Precision (CV, %) and Accuracy (RE, %)
Run 1 – LLOQQC plasma ultrafiltrate	0.625	3.11	0.608	374	310956	3.13	1662	2360873	0.193	0.12	14.006					LLOQQC
Run 1 – LLOQQC plasma ultrafiltrate	0.625	3.15	0.651	485	373484	3.13	2756	2794861	0.208	0.13	19.128					Mean =	0.658
Run 1 – LLOQQC plasma ultrafiltrate	0.625	3.13	0.668	484	362253	3.13	2731	2725483	0.214	0.13	19.203					Standard Deviation =	0.0315198
Run 1 – LLOQQC plasma ultrafiltrate	0.625	3.09	0.671	534	397254	3.14	2621	2974943	0.215	0.13	15.18					Precision (Coefficient of Variation, %) =	4.79025
Run 1 – LLOQQC plasma ultrafiltrate	0.625	3.14	0.692	538	387597	3.13	2361	2907491	0.222	0.14	12.445					Accuracy (Relative Error, %) =	5.28
Run 1 – LCQC plasma ultrafiltrate	1.5625	3.13	1.822	1585	411243	3.14	7115	3003686	0.247	0.39	32.258					LCQC
Run 1 – LCQC plasma ultrafiltrate	1.5625	3.14	1.548	1372	421333	3.13	6120	3164619	0.208	0.33	37.237					Mean =	1.7344
Run 1 – LCQC plasma ultrafiltrate	1.5625	3.1	1.728	1093	299316	3.13	4839	2231415	0.234	0.37	15.689					Standard Deviation =	0.109649
Run 1 – LCQC plasma ultrafiltrate	1.5625	3.15	1.794	1504	396575	3.14	6697	2962129	0.243	0.38	24.236					Precision (Coefficient of Variation, %) =	6.32199
Run 1 – LCQC plasma ultrafiltrate	1.5625	3.13	1.78	1502	399220	3.14	6913	2968720	0.241	0.38	57.499					Accuracy (Relative Error, %) =	11.0016
Run 1 – MCQC plasma ultrafiltrate	125	3.14	115.999	105819	418050	3.14	473142	3111976	0.203	25.31	1679.48					MCQC
Run 1 – MCQC plasma ultrafiltrate	125	3.14	115.653	105854	419438	3.14	468864	3116251	0.202	25.24	1459.71					Mean =	117.193
Run 1 – MCQC plasma ultrafiltrate	125	3.14	116.92	102232	400694	3.13	454826	2984584	0.204	25.51	870.49					Standard Deviation =	2.69352
Run 1 – MCQC plasma ultrafiltrate	125	3.14	121.908	109719	412439	3.13	491184	3055669	0.213	26.6	1192.94					Precision (Coefficient of Variation, %) =	2.29836
Run 1 – MCQC plasma ultrafiltrate	125	3.14	115.485	105589	418995	3.14	475300	3109680	0.202	25.2	1433.76					Accuracy (Relative Error, %) =	-6.2456
Run 1 – HCQC plasma ultrafiltrate	200	3.13	205.534	137583	306696	3.13	703642	2277596	0.224	44.86	1783.1					HCQC
Run 1 – HCQC plasma ultrafiltrate	200	3.13	218.946	146319	306184	3.13	640121	2290451	0.239	47.79	1956.62					Mean =	204.1
Run 1 – HCQC plasma ultrafiltrate	200	3.13	237.653	145687	280859	3.14	637041	2022940	0.259	51.87	1247.88					Standard Deviation =	25.5203
Run 1 – HCQC plasma ultrafiltrate	200	3.13	176.422	153657	399067	3.14	679649	2970114	0.193	38.5	1967.61					Precision (Coefficient of Variation, %) =	12.5038
Run 1 – HCQC plasma ultrafiltrate	200	3.14	181.946	163590	411961	3.13	723446	3057608	0.199	39.71	1442.67					Accuracy (Relative Error, %) =	2.0501
Run 1 – DQC plasma ultrafiltrate	50	3.13	46.467	42783	422233	3.14	188293	3130148	0.203	10.13	473.248					DQC
Run 1 – DQC plasma ultrafiltrate	50	3.14	45.891	40962	409343	3.14	181210	3018830	0.2	10.01	66.991					Mean =	45.2166
Run 1 – DQC plasma ultrafiltrate	50	3.14	42.771	38481	412646	3.13	171986	3069619	0.187	9.33	627.186					Standard Deviation =	1.61836
Run 1 – DQC plasma ultrafiltrate	50	3.14	44.395	38164	394246	3.13	168783	2940091	0.194	9.68	698.367					Precision (Coefficient of Variation, %) =	3.57913
Run 1 – DQC plasma ultrafiltrate	50	3.14	46.559	40213	396084	3.14	176531	2957636	0.203	10.15	383.521					Accuracy (Relative Error, %) =	-9.5668
Between-run
Sample	Standard concentration (ng/mL)	RT	Concentration (ng/mL)	Analyte area	Internal standard area	IS RT	Height	IS Height	RRF	Response	Signal/Noise					Between-run Precision (CV, %) and Accuracy (RE, %)
Run 1 – LLOQQC plasma ultrafiltrate	0.625	3.11	0.608	374	310956	3.13	1662	2360873	0.193	0.12	14.006					LLOQQC
Run 1 – LLOQQC plasma ultrafiltrate	0.625	3.15	0.651	485	373484	3.13	2756	2794861	0.208	0.13	19.128					Mean =	0.6192
Run 1 – LLOQQC plasma ultrafiltrate	0.625	3.13	0.668	484	362253	3.13	2731	2725483	0.214	0.13	19.203					Standard Deviation =	0.0786504
Run 1 – LLOQQC plasma ultrafiltrate	0.625	3.09	0.671	534	397254	3.14	2621	2974943	0.215	0.13	15.18					Precision (Coefficient of Variation, %) =	12.7019
Run 1 – LLOQQC plasma ultrafiltrate	0.625	3.14	0.692	538	387597	3.13	2361	2907491	0.222	0.14	12.445					Accuracy (Relative Error, %) =	-0.928
Run 2 – LLOQQC plasma ultrafiltrate	0.625	3.11	0.608	374	310956	3.13	1662	2360873	0.193	0.12	14.006
Run 2 – LLOQQC plasma ultrafiltrate	0.625	3.15	0.651	485	373484	3.13	2756	2794861	0.208	0.13	19.128
Run 2 – LLOQQC plasma ultrafiltrate	0.625	3.13	0.668	484	362253	3.13	2731	2725483	0.214	0.13	19.203
Run 2 – LLOQQC plasma ultrafiltrate	0.625	3.09	0.671	534	397254	3.14	2621	2974943	0.215	0.13	15.18
Run 2 – LLOQQC plasma ultrafiltrate	0.625	3.14	0.692	538	387597	3.13	2361	2907491	0.222	0.14	12.445
Run 3 – LLOQQC plasma ultrafiltrate	0.625	3.12	0.547	622	422898	3.12	2791	3166260	0.235	0.15	21.897
Run 3 – LLOQQC plasma ultrafiltrate	0.625	3.17	0.669	681	392541	3.12	3355	2949468	0.277	0.17	15.909
Run 3 – LLOQQC plasma ultrafiltrate	0.625	3.16	0.521	614	434361	3.12	2696	3224056	0.226	0.14	12.228
Run 3 – LLOQQC plasma ultrafiltrate	0.625	3.19	0.413	445	376231	3.12	2346	2820177	0.189	0.12	17.828
Run 3 – LLOQQC plasma ultrafiltrate	0.625	3.19	0.558	660	441113	3.12	3039	3256658	0.239	0.15	12.402
Run 1 – LCQC plasma ultrafiltrate	1.5625	3.13	1.822	1585	411243	3.14	7115	3003686	0.247	0.39	32.258					LCQC
Run 1 – LCQC plasma ultrafiltrate	1.5625	3.14	1.548	1372	421333	3.13	6120	3164619	0.208	0.33	37.237					Mean =	1.7548
Run 1 – LCQC plasma ultrafiltrate	1.5625	3.1	1.728	1093	299316	3.13	4839	2231415	0.234	0.37	15.689					Standard Deviation =	0.135766
Run 1 – LCQC plasma ultrafiltrate	1.5625	3.15	1.794	1504	396575	3.14	6697	2962129	0.243	0.38	24.236					Precision (Coefficient of Variation, %) =	7.73685
Run 1 – LCQC plasma ultrafiltrate	1.5625	3.13	1.78	1502	399220	3.14	6913	2968720	0.241	0.38	57.499					Accuracy (Relative Error, %) =	12.3072
Run 2 – LCQC plasma ultrafiltrate	1.5625	3.13	1.822	1585	411243	3.14	7115	3003686	0.247	0.39	32.258
Run 2 – LCQC plasma ultrafiltrate	1.5625	3.14	1.548	1372	421333	3.13	6120	3164619	0.208	0.33	37.237
Run 2 – LCQC plasma ultrafiltrate	1.5625	3.1	1.728	1093	299316	3.13	4839	2231415	0.234	0.37	15.689
Run 2 – LCQC plasma ultrafiltrate	1.5625	3.15	1.794	1504	396575	3.14	6697	2962129	0.243	0.38	24.236
Run 2 – LCQC plasma ultrafiltrate	1.5625	3.13	1.78	1502	399220	3.14	6913	2968720	0.241	0.38	57.499
Run 3 – LCQC plasma ultrafiltrate	1.5625	3.2	1.51	1643	398118	3.14	8031	2945311	0.264	0.41	38.296
Run 3 – LCQC plasma ultrafiltrate	1.5625	3.2	2.028	1795	324638	3.14	7828	2446175	0.354	0.55	41.041
Run 3 – LCQC plasma ultrafiltrate	1.5625	3.18	1.82	1958	394226	3.14	9563	2928975	0.318	0.5	61.346
Run 3 – LCQC plasma ultrafiltrate	1.5625	3.15	1.89	1569	304383	3.14	6440	2282370	0.33	0.52	29.773
Run 3 – LCQC plasma ultrafiltrate	1.5625	3.2	1.73	1801	381303	3.14	8071	2833518	0.302	0.47	31.246
Run 1 – MCQC plasma ultrafiltrate	125	3.14	115.999	105819	418050	3.14	473142	3111976	0.203	25.31	1679.48					MCQC
Run 1 – MCQC plasma ultrafiltrate	125	3.14	115.653	105854	419438	3.14	468864	3116251	0.202	25.24	1459.71					Mean =	126.002
Run 1 – MCQC plasma ultrafiltrate	125	3.14	116.92	102232	400694	3.13	454826	2984584	0.204	25.51	870.49					Standard Deviation =	13.342
Run 1 – MCQC plasma ultrafiltrate	125	3.14	121.908	109719	412439	3.13	491184	3055669	0.213	26.6	1192.94					Precision (Coefficient of Variation, %) =	10.5887
Run 1 – MCQC plasma ultrafiltrate	125	3.14	115.485	105589	418995	3.14	475300	3109680	0.202	25.2	1433.76					Accuracy (Relative Error, %) =	0.801867
Run 2 – MCQC plasma ultrafiltrate	125	3.14	115.999	105819	418050	3.14	473142	3111976	0.203	25.31	1679.48
Run 2 – MCQC plasma ultrafiltrate	125	3.14	115.653	105854	419438	3.14	468864	3116251	0.202	25.24	1459.71
Run 2 – MCQC plasma ultrafiltrate	125	3.14	116.92	102232	400694	3.13	454826	2984584	0.204	25.51	870.49
Run 2 – MCQC plasma ultrafiltrate	125	3.14	121.908	109719	412439	3.13	491184	3055669	0.213	26.6	1192.94
Run 2 – MCQC plasma ultrafiltrate	125	3.14	115.485	105589	418995	3.14	475300	3109680	0.202	25.2	1433.76
Run 3 – MCQC plasma ultrafiltrate	125	3.2	145.038	146781	373457	3.14	648767	2757050	0.314	39.3	1737.09
Run 3 – MCQC plasma ultrafiltrate	125	3.2	144.631	158463	404315	3.14	713126	2985573	0.314	39.19	1891.21
Run 3 – MCQC plasma ultrafiltrate	125	3.2	147.762	152670	381283	3.14	681971	2823575	0.32	40.04	1652.24
Run 3 – MCQC plasma ultrafiltrate	125	3.21	146.003	143959	363857	3.14	648384	2676059	0.317	39.56	2102.98
Run 3 – MCQC plasma ultrafiltrate	125	3.18	134.671	139020	380940	3.14	625901	2833451	0.292	36.49	977.372
Run 1 – HCQC plasma ultrafiltrate	200	3.13	205.534	137583	306696	3.13	703642	2277596	0.224	44.86	1783.1					HCQC
Run 1 – HCQC plasma ultrafiltrate	200	3.13	218.946	146319	306184	3.13	640121	2290451	0.239	47.79	1956.62					Mean =	200.784
Run 1 – HCQC plasma ultrafiltrate	200	3.13	237.653	145687	280859	3.14	637041	2022940	0.259	51.87	1247.88					Standard Deviation =	20.8305
Run 1 – HCQC plasma ultrafiltrate	200	3.13	176.422	153657	399067	3.14	679649	2970114	0.193	38.5	1967.61					Precision (Coefficient of Variation, %) =	10.3745
Run 1 – HCQC plasma ultrafiltrate	200	3.14	181.946	163590	411961	3.13	723446	3057608	0.199	39.71	1442.67					Accuracy (Relative Error, %) =	0.392233
Run 2 – HCQC plasma ultrafiltrate	200	3.13	205.534	137583	306696	3.13	703642	2277596	0.224	44.86	1783.1
Run 2 – HCQC plasma ultrafiltrate	200	3.13	218.946	146319	306184	3.13	640121	2290451	0.239	47.79	1956.62
Run 2 – HCQC plasma ultrafiltrate	200	3.13	237.653	145687	280859	3.14	637041	2022940	0.259	51.87	1247.88
Run 2 – HCQC plasma ultrafiltrate	200	3.13	176.422	153657	399067	3.14	679649	2970114	0.193	38.5	1967.61
Run 2 – HCQC plasma ultrafiltrate	200	3.14	181.946	163590	411961	3.13	723446	3057608	0.199	39.71	1442.67
Run 3 – HCQC plasma ultrafiltrate	200	3.18	207.81	222961	395939	3.13	1000340	2933641	0.282	56.31	3275.88
Run 3 – HCQC plasma ultrafiltrate	200	3.18	193.772	208367	396826	3.13	943606	2951060	0.263	52.51	2153.57
Run 3 – HCQC plasma ultrafiltrate	200	3.16	203.368	214912	389980	3.13	963184	2884902	0.276	55.11	4384.19
Run 3 – HCQC plasma ultrafiltrate	200	3.15	180.658	167593	342343	3.13	748066	2571599	0.245	48.95	4527.9
Run 3 – HCQC plasma ultrafiltrate	200	3.16	185.157	198398	395420	3.13	891274	2920158	0.251	50.17	2507.76
Run 1 – DQC plasma ultrafiltrate	50	3.13	46.467	42783	422233	3.14	188293	3130148	0.203	10.13	473.248					DQC
Run 1 – DQC plasma ultrafiltrate	50	3.14	45.891	40962	409343	3.14	181210	3018830	0.2	10.01	66.991					Mean =	45.3289
Run 1 – DQC plasma ultrafiltrate	50	3.14	42.771	38481	412646	3.13	171986	3069619	0.187	9.33	627.186					Standard Deviation =	1.30102
Run 1 – DQC plasma ultrafiltrate	50	3.14	44.395	38164	394246	3.13	168783	2940091	0.194	9.68	698.367					Precision (Coefficient of Variation, %) =	2.87018
Run 1 – DQC plasma ultrafiltrate	50	3.14	46.559	40213	396084	3.14	176531	2957636	0.203	10.15	383.521					Accuracy (Relative Error, %) =	-9.34213
Run 2 – DQC plasma ultrafiltrate	50	3.13	46.467	42783	422233	3.14	188293	3130148	0.203	10.13	473.248
Run 2 – DQC plasma ultrafiltrate	50	3.14	45.891	40962	409343	3.14	181210	3018830	0.2	10.01	66.991
Run 2 – DQC plasma ultrafiltrate	50	3.14	42.771	38481	412646	3.13	171986	3069619	0.187	9.33	627.186
Run 2 – DQC plasma ultrafiltrate	50	3.14	44.395	38164	394246	3.13	168783	2940091	0.194	9.68	698.367
Run 2 – DQC plasma ultrafiltrate	50	3.14	46.559	40213	396084	3.14	176531	2957636	0.203	10.15	383.521
Run 3 – DQC plasma ultrafiltrate	50	3.16	46.096	51548	412588	3.13	230867	3056867	0.25	12.49	543.579
Run 3 – DQC plasma ultrafiltrate	50	3.16	45.643	52320	422925	3.13	233721	3135004	0.247	12.37	251.74
Run 3 – DQC plasma ultrafiltrate	50	3.17	45.352	50885	413961	3.12	231311	3063394	0.246	12.29	832.527
Run 3 – DQC plasma ultrafiltrate	50	3.16	46.321	48259	384392	3.12	216184	2875218	0.251	12.55	303.977
Run 3 – DQC plasma ultrafiltrate	50	3.16	44.356	51981	432374	3.12	236830	3217326	0.24	12.02	1215.89
Stabilities
Short-term temperature
Sample	Standard concentration (ng/mL)	RT	Concentration (ng/mL)	Analyte area	Internal standard area	IS RT	Height	IS Height	RRF	Response	Signal/Noise					Short-term temperature stability Precision (CV, %) and Accuracy (RE, %)
LCQC plasma ultrafiltrate	1.5625	3.15	1.507	1596	422310	3.12	7308	3130087	0.242	0.38	52.378					LCQC
LCQC plasma ultrafiltrate	1.5625	3.18	1.618	1701	421006	3.12	7324	3135958	0.259	0.4	63.725					Mean =	1.563
LCQC plasma ultrafiltrate	1.5625	3.18	1.469	1412	382561	3.12	6760	2857420	0.236	0.37	26.487					Standard Deviation =	0.0887722
LCQC plasma ultrafiltrate	1.5625	3.15	1.688	1678	399040	3.12	7694	2968203	0.269	0.42	38.601					Precision (Coefficient of Variation, %) =	5.6796
LCQC plasma ultrafiltrate	1.5625	3.18	1.533	1523	396699	3.12	7154	2958214	0.246	0.38	38.868					Accuracy (Relative Error, %) =	0.032
HCQC plasma ultrafiltrate	200	3.17	196.523	187107	404839	3.12	849941	3008861	0.231	46.22	3592.88					HCQC
HCQC plasma ultrafiltrate	200	3.16	188.533	180531	407155	3.12	806851	3008089	0.222	44.34	3313.04					Mean =	188.808
HCQC plasma ultrafiltrate	200	3.16	191.816	187019	414574	3.12	834410	3081377	0.226	45.11	2737.17					Standard Deviation =	5.6069
HCQC plasma ultrafiltrate	200	3.16	184.713	180357	415169	3.12	810662	3089357	0.217	43.44	717.842					Precision (Coefficient of Variation, %) =	2.96962
HCQC plasma ultrafiltrate	200	3.16	182.457	178469	415900	3.12	806383	3074459	0.215	42.91	950.616					Accuracy (Relative Error, %) =	-5.5958
Post-preparative
Sample	Standard concentration (ng/mL)	RT	Concentration (ng/mL)	Analyte area	Internal standard area	IS RT	Height	IS Height	RRF	Response	Signal/Noise					Short-term temperature stability Precision (CV, %) and Accuracy (RE, %)
LCQC plasma ultrafiltrate	1.5625	3.18	1.759	2033	460157	3.13	8948	3432196	0.283	0.44	75.602					LCQC
LCQC plasma ultrafiltrate	1.5625	3.2	1.585	1796	454395	3.13	8475	3382149	0.253	0.4	51.903					Mean =	1.688
LCQC plasma ultrafiltrate	1.5625	3.17	1.664	1829	439200	3.13	8336	3248962	0.266	0.42	41.581					Standard Deviation =	0.0822223
LCQC plasma ultrafiltrate	1.5625	3.18	1.784	1884	420293	3.13	9856	3112324	0.287	0.45	91.7					Precision (Coefficient of Variation, %) =	4.87099
LCQC plasma ultrafiltrate	1.5625	3.16	1.648	1707	414325	3.13	8532	3071992	0.264	0.41	42.119					Accuracy (Relative Error, %) =	8.032
HCQC plasma ultrafiltrate	200	3.19	193.24	217264	419896	3.13	961268	3117412	0.259	51.74	3388.23					HCQC
HCQC plasma ultrafiltrate	200	3.19	202.564	224999	414816	3.13	1003537	3087588	0.271	54.24	2463.15					Mean =	205.163
HCQC plasma ultrafiltrate	200	3.19	204.97	226275	412270	3.13	1011473	3059321	0.274	54.89	1546.66					Standard Deviation =	12.8845
HCQC plasma ultrafiltrate	200	3.19	198.259	211595	398579	3.13	953801	2944453	0.265	53.09	2044.61					Precision (Coefficient of Variation, %) =	6.28011
HCQC plasma ultrafiltrate	200	3.19	226.783	233803	384992	3.13	1038134	2872426	0.304	60.73	2926.88					Accuracy (Relative Error, %) =	2.5816
Non-specific binding to the membrane
Sample	Standard concentration (ng/mL)	RT	Concentration (ng/mL)	Analyte area	Internal standard area	IS RT	Height	IS Height	RRF	Response	Signal/Noise					Short-term temperature stability Precision (CV, %) and Accuracy (RE, %)
LCQC – filtered	1.5625	3.18	1.114	1288	590309	3.1	6028	4201238	0.14	0.22	20.448					LCQC
LCQC – filtered	1.5625	3.2	1.263	1510	610352	3.1	6987	4347326	0.158	0.25	35.775					Mean =	1.3403
LCQC – filtered	1.5625	3.19	1.443	1465	518384	3.1	7385	4172638	0.181	0.28	24.612					Standard Deviation =	0.145217
LCQC – filtered	1.5625	3.2	1.216	1426	598812	3.1	7360	4431706	0.152	0.24	26.324					Precision (Coefficient of Variation, %) =	10.8347
LCQC – filtered	1.5625	3.21	1.435	1617	575451	3.1	7715	4029203	0.18	0.28	20.285					Accuracy (Relative Error, %) =	-14.2208
LCQC – unfiltered	1.5625	3.18	1.194	1434	613513	3.1	6283	4231143	0.15	0.23	21.313
LCQC – unfiltered	1.5625	3.2	1.422	1785	640764	3.1	7551	4388183	0.178	0.28	38.663
LCQC – unfiltered	1.5625	3.19	1.36	1727	648578	3.1	7800	4460595	0.17	0.27	25.995
LCQC – unfiltered	1.5625	3.2	1.353	1735	654893	3.1	8048	4529554	0.17	0.26	28.785
LCQC – unfiltered	1.5625	3.21	1.603	1861	592575	3.1	8306	4080920	0.201	0.31	21.839
HCQC – filtered	60	3.2	60.706	81956	690038	3.1	387917	4592903	0.059	11.88	1152.04					HCQC
HCQC – filtered	60	3.2	67.398	85593	649102	3.1	388531	4627185	0.066	13.19	2464.67					Mean =	69.1353
HCQC – filtered	60	3.2	65.132	88201	692147	3.1	417691	4686326	0.064	12.74	895.925					Standard Deviation =	5.37019
HCQC – filtered	60	3.2	73.991	80807	558209	3.1	379527	4289450	0.072	14.48	1656.82					Precision (Coefficient of Variation, %) =	7.76765
HCQC – filtered	60	3.2	73.502	94634	658073	3.1	445420	4378030	0.072	14.38	1022.65					Accuracy (Relative Error, %) =	15.2255
HCQC – unfiltered	60	3.2	66.416	86941	669073	3.1	393443	4580280	0.065	12.99	1168.45
HCQC – unfiltered	60	3.2	67.592	90504	684372	3.1	392401	4670303	0.066	13.22	2489.22
HCQC – unfiltered	60	3.2	70.293	93145	677282	3.1	423327	4670653	0.069	13.75	908.014
HCQC – unfiltered	60	3.2	66.709	85782	657248	3.1	386089	4465964	0.065	13.05	1685.47
HCQC – unfiltered	60	3.2	79.614	100004	642029	3.1	451010	4365704	0.078	15.58	1035.49

## Sheet: Urine validation
Urine validation
Matrix Effect
Sample	Standard concentration (ng/mL)	RT	Concentration (ng/mL)	Analyte area	Internal standard area	IS RT	Height	IS Height	RRF	Response	Signal/Noise		Analyte area / internal standard area	Matrix Factor Normalized by Internal Standard		Matrix Factor Normalized by Internal Standard
LCQC urine (normal #1)	10	3.21		3984.34	257840	2.24	19375	2032139	0.00155	0.0155	156.964		0.0154528	1.84035		Mean =	1.7359
LCQC urine (normal #2)	10	3.2		3890.68	246768	2.24	18251	1959750	0.00158	0.0158	300.988		0.0157665	1.87771		Standard Deviation =	0.154434
LCQC urine (normal #3)	10	3.23		4083.59	268175	2.24	19369	2125848	0.00152	0.0152	192.058		0.0152273	1.8135		Coefficient of Variation (%) =	8.89645
LCQC urine (normal #4)	10	3.2		4147.54	286547	2.24	20054	2217807	0.00145	0.0145	87.97		0.0144742	1.7238
LCQC urine (normal #5)	10	3.27		4293.27	362510	2.25	19354	2827637	0.00118	0.0118	211.172		0.0118432	1.41046
LCQC urine (menstrual period #1)	10	3.19		4066.59	256045	2.24	19997	2011216	0.00159	0.0159	107.045		0.0158823	1.8915
LCQC solution	10	3.28		3881.56	481062	2.25	17560	3695361	0.00081	0.0081	172.375		0.00806873
LCQC solution	10	3.28		4465.23	496244	2.25	19775	3858303	0.0009	0.009	89.91		0.00899805
LCQC solution	10	3.28		4364.73	537316	2.25	20561	4176817	0.00081	0.0081	181.522		0.00812321
HCQC urine (normal #1)	800	3.2		369857	287976	2.24	1760386	2261124	0.00161	1.2843	4607.47		1.28433	1.93179
HCQC urine (normal #2)	800	3.2		329899	291921	2.24	1558045	2291751	0.00141	1.1301	5073.29		1.13009	1.6998
HCQC urine (normal #3)	800	3.21		316961	288699	2.24	1536497	2280739	0.00137	1.0979	13550.4		1.0979	1.65137
HCQC urine (normal #4)	800	3.19		351093	293260	2.24	1687133	2318321	0.0015	1.1972	13139.1		1.1972	1.80074
HCQC urine (normal #5)	800	3.27		440859	404090	2.25	2001732	3133417	0.00136	1.091	6157.56		1.09099	1.64098
HCQC urine (menstrual period #1)	800	3.19		313939	304881	2.24	1483003	2391477	0.00129	1.0297	5213.07		1.02971	1.54881
HCQC solution	800	3.28		326592	537089	2.25	1454282	4190157	0.00076	0.6081	2939.51		0.608078
HCQC solution	800	3.28		355007	525853	2.25	1581083	4090215	0.00084	0.6751	1153.87		0.675107
HCQC solution	800	3.29		397356	558607	2.25	1768975	4339987	0.00089	0.7113	14075.4		0.711335
Precision and Accuracy
Within-run
Sample	Standard concentration (ng/mL)	RT	Concentration (ng/mL)	Analyte area	Internal standard area	IS RT	Height	IS Height	RRF	Response	Signal/Noise					Within-run Precision (CV, %) and Accuracy (RE, %)
Run 1 – LLOQQC urine	5	3.15	5.516	1743.62	205732	2.23	8014	1926600	0.0017	0.0085	57.535					LLOQQC
Run 1 – LLOQQC urine	5	3.17	4.723	1642.33	221219	2.23	8046	2077912	0.00148	0.0074	46.293					Mean =	4.9548
Run 1 – LLOQQC urine	5	3.18	4.691	1606.62	217670	2.23	7462	2082472	0.00148	0.0074	36.883					Standard Deviation =	0.362956
Run 1 – LLOQQC urine	5	3.17	4.714	1622.09	218865	2.23	7416	2086192	0.00148	0.0074	60.678					Precision (Coefficient of Variation, %) =	7.32533
Run 1 – LLOQQC urine	5	3.17	5.13	1759.76	220974	2.23	8278	2073413	0.00159	0.008	39.512					Accuracy (Relative Error, %) =	-0.904
Run 1 – LCQC urine	10	3.17	9.836	3011.32	211997	2.23	14178	2011443	0.00142	0.0142	38.664					LCQC
Run 1 – LCQC urine	10	3.17	9.438	3134.22	229169	2.23	15406	2158235	0.00137	0.0137	67.221					Mean =	9.7688
Run 1 – LCQC urine	10	3.17	9.934	3166.91	220939	2.23	15649	2073590	0.00143	0.0143	69.21					Standard Deviation =	0.302158
Run 1 – LCQC urine	10	3.17	10.149	3219	220195	2.23	15117	2077782	0.00146	0.0146	117.858					Precision (Coefficient of Variation, %) =	3.0931
Run 1 – LCQC urine	10	3.18	9.487	2943.61	214219	2.23	14443	2014489	0.00137	0.0137	71.441					Accuracy (Relative Error, %) =	-2.312
Run 1 – MCQC urine	500	3.17	487.679	151288	233508	2.23	724436	2196378	0.0013	0.6479	1618.41					MCQC
Run 1 – MCQC urine	500	3.17	505.325	156343	232897	2.23	746174	2181996	0.00134	0.6713	2792.31					Mean =	504.35
Run 1 – MCQC urine	500	3.17	503.206	153386	229453	2.23	740449	2143880	0.00134	0.6685	4985.11					Standard Deviation =	16.557
Run 1 – MCQC urine	500	3.17	494.404	157981	240527	2.23	760712	2244725	0.00131	0.6568	3097.8					Precision (Coefficient of Variation, %) =	3.28285
Run 1 – MCQC urine	500	3.17	531.135	158262	224319	2.23	762452	2122521	0.00141	0.7055	4188.76					Accuracy (Relative Error, %) =	0.86996
Run 1 – HCQC urine	800	3.17	770.692	236094	230739	2.23	1123351	2123433	0.00128	1.0232	5424.36					HCQC
Run 1 – HCQC urine	800	3.17	809.419	243392	226502	2.23	1158133	2123617	0.00134	1.0746	3872.2					Mean =	763.986
Run 1 – HCQC urine	800	3.17	739.575	231565	235823	2.23	1104416	2183167	0.00123	0.9819	5738.37					Standard Deviation =	30.7436
Run 1 – HCQC urine	800	3.17	768.711	239350	234522	2.23	1138886	2171127	0.00128	1.0206	3888.85					Precision (Coefficient of Variation, %) =	4.02411
Run 1 – HCQC urine	800	3.16	731.531	210836	217071	2.23	980647	2014483	0.00121	0.9713	5222.21					Accuracy (Relative Error, %) =	-4.5018
Run 1 – DQC urine	500	3.17	520.66	159065	229984	2.23	764292	2143950	0.00138	0.6916	4555.05					DQC
Run 1 – DQC urine	500	3.17	548.79	168680	231406	2.23	807248	2127613	0.00146	0.7289	3220.54					Mean =	531.368
Run 1 – DQC urine	500	3.17	539.107	166687	232772	2.23	801096	2131888	0.00143	0.7161	4913.43					Standard Deviation =	14.0139
Run 1 – DQC urine	500	3.17	514.066	130177	190628	2.23	627019	1737858	0.00137	0.6829	1459.49					Precision (Coefficient of Variation, %) =	2.63733
Run 1 – DQC urine	500	3.17	534.218	163088	229827	2.23	783950	2101658	0.00142	0.7096	6054.66					Accuracy (Relative Error, %) =	6.27364
Between-run
Sample	Standard concentration (ng/mL)	RT	Concentration (ng/mL)	Analyte area	Internal standard area	IS RT	Height	IS Height	RRF	Response	Signal/Noise					Between-run Precision (CV, %) and Accuracy (RE, %)
Run 1 – LLOQQC urine	5	3.15	5.516	1743.62	205732	2.23	8014	1926600	0.0017	0.0085	57.535					LLOQQC
Run 1 – LLOQQC urine	5	3.17	4.723	1642.33	221219	2.23	8046	2077912	0.00148	0.0074	46.293					Mean =	5.15833
Run 1 – LLOQQC urine	5	3.18	4.691	1606.62	217670	2.23	7462	2082472	0.00148	0.0074	36.883					Standard Deviation =	0.357158
Run 1 – LLOQQC urine	5	3.17	4.714	1622.09	218865	2.23	7416	2086192	0.00148	0.0074	60.678					Precision (Coefficient of Variation, %) =	6.92391
Run 1 – LLOQQC urine	5	3.17	5.13	1759.76	220974	2.23	8278	2073413	0.00159	0.008	39.512					Accuracy (Relative Error, %) =	3.16667
Run 2 – LLOQQC urine	5	3.18	4.988	1648.16	228576	2.23	8228	2137806	0.00144	0.0072	63.662
Run 2 – LLOQQC urine	5	3.18	5.346	1910.04	247852	2.23	8901	2321264	0.00154	0.0077	41.792
Run 2 – LLOQQC urine	5	3.17	4.743	1674.14	243584	2.23	7958	2294789	0.00137	0.0069	103.524
Run 2 – LLOQQC urine	5	3.18	4.797	1783.53	256734	2.23	8272	2382120	0.00139	0.0069	62.644
Run 2 – LLOQQC urine	5	3.18	5.203	1689.4	224990	2.23	7629	2108692	0.0015	0.0075	104.329
Run 3 – LLOQQC urine	5	3.19	5.266	1818.41	212059	2.23	8615	1746559	0.00172	0.0086	62.167
Run 3 – LLOQQC urine	5	3.2	5.548	1850.93	205403	2.23	8492	1697059	0.0018	0.009	58.063
Run 3 – LLOQQC urine	5	3.2	5.491	1773.37	198757	2.23	8019	1642649	0.00178	0.0089	70.097
Run 3 – LLOQQC urine	5	3.19	5.635	1874.41	204936	2.23	8617	1690542	0.00183	0.0091	82.545
Run 3 – LLOQQC urine	5	3.19	5.584	1843.02	203265	2.23	8850	1679150	0.00181	0.0091	77.907
Run 1 – LCQC urine	10	3.17	9.836	3011.32	211997	2.23	14178	2011443	0.00142	0.0142	38.664					LCQC
Run 1 – LCQC urine	10	3.17	9.438	3134.22	229169	2.23	15406	2158235	0.00137	0.0137	67.221					Mean =	10.021
Run 1 – LCQC urine	10	3.17	9.934	3166.91	220939	2.23	15649	2073590	0.00143	0.0143	69.21					Standard Deviation =	0.458311
Run 1 – LCQC urine	10	3.17	10.149	3219	220195	2.23	15117	2077782	0.00146	0.0146	117.858					Precision (Coefficient of Variation, %) =	4.57351
Run 1 – LCQC urine	10	3.18	9.487	2943.61	214219	2.23	14443	2014489	0.00137	0.0137	71.441					Accuracy (Relative Error, %) =	0.21
Run 2 – LCQC urine	10	3.16	9.902	3285.39	223001	2.23	15021	2096110	0.00147	0.0147	85.105
Run 2 – LCQC urine	10	3.17	9.961	3473.99	234632	2.23	16344	2165453	0.00148	0.0148	116.561
Run 2 – LCQC urine	10	3.17	9.571	3250.3	227066	2.23	15792	2118593	0.00143	0.0143	111.96
Run 2 – LCQC urine	10	3.15	10.01	3367.36	226483	2.23	15924	2109349	0.00149	0.0149	192.035
Run 2 – LCQC urine	10	3.15	9.678	3106.51	214980	2.23	14475	2005108	0.00145	0.0145	183.155
Run 3 – LCQC urine	10	3.2	11.134	3384.47	191746	2.23	15539	1591588	0.00177	0.0177	97.906
Run 3 – LCQC urine	10	3.19	10.279	3402.72	208403	2.23	15061	1720675	0.00163	0.0163	95.808
Run 3 – LCQC urine	10	3.2	10.21	3207.97	197771	2.23	15372	1628400	0.00162	0.0162	112.195
Run 3 – LCQC urine	10	3.19	9.948	3249.24	205449	2.23	14342	1694812	0.00158	0.0158	160.717
Run 3 – LCQC urine	10	3.2	10.778	3423.05	200187	2.23	15464	1648159	0.00171	0.0171	127.114
Run 1 – MCQC urine	500	3.17	487.679	151288	233508	2.23	724436	2196378	0.0013	0.6479	1618.41					MCQC
Run 1 – MCQC urine	500	3.17	505.325	156343	232897	2.23	746174	2181996	0.00134	0.6713	2792.31					Mean =	517.63
Run 1 – MCQC urine	500	3.17	503.206	153386	229453	2.23	740449	2143880	0.00134	0.6685	4985.11					Standard Deviation =	19.3484
Run 1 – MCQC urine	500	3.17	494.404	157981	240527	2.23	760712	2244725	0.00131	0.6568	3097.8					Precision (Coefficient of Variation, %) =	3.73788
Run 1 – MCQC urine	500	3.17	531.135	158262	224319	2.23	762452	2122521	0.00141	0.7055	4188.76					Accuracy (Relative Error, %) =	3.52591
Run 2 – MCQC urine	500	3.17	529.753	155506	232127	2.23	743813	2163792	0.00134	0.6699	4665.53
Run 2 – MCQC urine	500	3.16	512.928	151663	233790	2.23	719146	2172919	0.0013	0.6487	2867.52
Run 2 – MCQC urine	500	3.16	499.534	140778	222809	2.23	661485	2099994	0.00126	0.6318	2505.77
Run 2 – MCQC urine	500	3.16	523.045	147513	223010	2.23	693889	2083025	0.00132	0.6615	3558.69
Run 2 – MCQC urine	500	3.17	519.072	149794	228186	2.23	706271	2106738	0.00131	0.6565	1362.91
Run 3 – MCQC urine	500	3.2	530.347	172089	209697	2.23	795859	1735927	0.00164	0.8207	4184
Run 3 – MCQC urine	500	3.2	515.213	169278	212328	2.23	790035	1758003	0.00159	0.7972	3898.8
Run 3 – MCQC urine	500	3.2	565.513	172489	197121	2.23	794980	1626077	0.00175	0.875	4006.8
Run 3 – MCQC urine	500	3.2	513.594	168941	212572	2.23	789142	1743503	0.00159	0.7947	3135.67
Run 3 – MCQC urine	500	3.2	533.695	173089	209594	2.23	801334	1733550	0.00165	0.8258	1968.82
Run 1 – HCQC urine	800	3.17	770.692	236094	230739	2.23	1123351	2123433	0.00128	1.0232	5424.36					HCQC
Run 1 – HCQC urine	800	3.17	809.419	243392	226502	2.23	1158133	2123617	0.00134	1.0746	3872.2					Mean =	764.393
Run 1 – HCQC urine	800	3.17	739.575	231565	235823	2.23	1104416	2183167	0.00123	0.9819	5738.37					Standard Deviation =	52.1137
Run 1 – HCQC urine	800	3.17	768.711	239350	234522	2.23	1138886	2171127	0.00128	1.0206	3888.85					Precision (Coefficient of Variation, %) =	6.81765
Run 1 – HCQC urine	800	3.16	731.531	210836	217071	2.23	980647	2014483	0.00121	0.9713	5222.21					Accuracy (Relative Error, %) =	-4.45089
Run 2 – HCQC urine	800	3.16	705.736	214369	240401	2.23	1008382	2238405	0.00111	0.8917	5453.64
Run 2 – HCQC urine	800	3.16	736.684	222422	238979	2.23	1030354	2221060	0.00116	0.9307	2936.34
Run 2 – HCQC urine	800	3.16	701.145	220799	249229	2.23	1028235	2313497	0.00111	0.8859	4716.82
Run 2 – HCQC urine	800	3.16	707.251	220552	246807	2.23	1028820	2296885	0.00112	0.8936	2527.97
Run 2 – HCQC urine	800	3.16	728.236	223974	243431	2.23	1051252	2245261	0.00115	0.9201	6975.46
Run 3 – HCQC urine	800	3.2	744.303	237848	206545	2.23	1090916	1707544	0.00144	1.1516	5345.13
Run 3 – HCQC urine	800	3.19	811.426	240399	191498	2.23	1137105	1589884	0.00157	1.2554	2568.16
Run 3 – HCQC urine	800	3.19	855.832	232681	175735	2.23	1087208	1461710	0.00166	1.324	3503.91
Run 3 – HCQC urine	800	3.19	792.515	215025	175370	2.23	991956	1463245	0.00153	1.2261	5373.13
Run 3 – HCQC urine	800	3.19	862.837	234999	176046	2.23	1092424	1456379	0.00167	1.3349	1579.04
Run 1 – DQC urine	500	3.17	520.66	159065	229984	2.23	764292	2143950	0.00138	0.6916	4555.05					DQC
Run 1 – DQC urine	500	3.17	548.79	168680	231406	2.23	807248	2127613	0.00146	0.7289	3220.54					Mean =	531.152
Run 1 – DQC urine	500	3.17	539.107	166687	232772	2.23	801096	2131888	0.00143	0.7161	4913.43					Standard Deviation =	19.8101
Run 1 – DQC urine	500	3.17	514.066	130177	190628	2.23	627019	1737858	0.00137	0.6829	1459.49					Precision (Coefficient of Variation, %) =	3.72965
Run 1 – DQC urine	500	3.17	534.218	163088	229827	2.23	783950	2101658	0.00142	0.7096	6054.66					Accuracy (Relative Error, %) =	6.23048
Run 2 – DQC urine	500	3.17	504.723	160658	251668	2.23	773936	2325562	0.00128	0.6384	1358.43
Run 2 – DQC urine	500	3.17	524.436	157788	237914	2.23	759844	2221798	0.00133	0.6632	2957.53
Run 2 – DQC urine	500	3.17	519.709	158859	241699	2.23	763215	2247880	0.00131	0.6573	3543.2
Run 2 – DQC urine	500	3.17	523.993	163931	247384	2.23	783400	2287055	0.00133	0.6627	3566.94
Run 2 – DQC urine	500	3.17	522.772	160944	243443	2.23	768531	2244558	0.00132	0.6611	3030.25
Run 3 – DQC urine	500	3.19	522.521	153770	190179	2.23	725239	1584174	0.00162	0.8086	2543.88
Run 3 – DQC urine	500	3.2	545.544	177077	209768	2.23	818316	1736924	0.00169	0.8442	3242.22
Run 3 – DQC urine	500	3.2	570.115	186449	211356	2.23	861613	1747547	0.00176	0.8822	3793.55
Run 3 – DQC urine	500	3.2	568.399	182986	208056	2.23	849093	1717766	0.00176	0.8795	3024.52
Run 3 – DQC urine	500	3.2	508.233	167324	212758	2.23	777103	1757571	0.00157	0.7865	1037.19
Stabilities
Freeze and thaw
Sample	Standard concentration (ng/mL)	RT	Concentration (ng/mL)	Analyte area	Internal standard area	IS RT	Height	IS Height	RRF	Response	Signal/Noise					Freeze and thaw stability Precision (CV, %) and Accuracy (RE, %)
LCQC urine	10	3.19	8.916	2561.17	203460	2.23	11547	1668023	0.00126	0.0126	138.173					LCQC
LCQC urine	10	3.19	8.858	2651.77	211912	2.23	11452	1736655	0.00125	0.0125	100.818					Mean =	9.4188
LCQC urine	10	3.18	9.666	2772.56	204612	2.23	12988	1690387	0.00136	0.0136	142.162					Standard Deviation =	0.510704
LCQC urine	10	3.19	10.029	2909.04	207553	2.23	12405	1696023	0.0014	0.014	91.565					Precision (Coefficient of Variation, %) =	5.42218
LCQC urine	10	3.19	9.625	2864.95	212261	2.23	11985	1736574	0.00135	0.0135	122.704					Accuracy (Relative Error, %) =	-5.812
HCQC urine	800	3.19	832.165	230284	215316	2.23	1001478	1767932	0.00134	1.0695	5275.89					HCQC
HCQC urine	800	3.19	828.404	225536	211833	2.23	978622	1740725	0.00133	1.0647	2665					Mean =	816.782
HCQC urine	800	3.19	795.846	225012	219977	2.23	979070	1803222	0.00128	1.0229	2164.04					Standard Deviation =	25.4271
HCQC urine	800	3.19	784.102	221538	219822	2.23	961318	1800805	0.00126	1.0078	6302.72					Precision (Coefficient of Variation, %) =	3.11308
HCQC urine	800	3.19	843.393	226003	208504	2.23	980678	1707744	0.00135	1.0839	9252.15					Accuracy (Relative Error, %) =	2.09775
Short-term temperature
Sample	Standard concentration (ng/mL)	RT	Concentration (ng/mL)	Analyte area	Internal standard area	IS RT	Height	IS Height	RRF	Response	Signal/Noise					Short-term temperature stability Precision (CV, %) and Accuracy (RE, %)
LCQC urine	10	3.2	9.575	3615.97	230264	2.23	16827	1896481	0.00157	0.0157	103.389					LCQC
LCQC urine	10	3.21	9.87	3609.57	223887	2.23	15558	1851015	0.00161	0.0161	166.458					Mean =	9.4124
LCQC urine	10	3.21	8.771	3244.09	222766	2.23	13934	1827416	0.00146	0.0146	95.066					Standard Deviation =	0.464035
LCQC urine	10	3.2	9.096	3405.66	226681	2.23	16384	1870360	0.0015	0.015	107.516					Precision (Coefficient of Variation, %) =	4.93004
LCQC urine	10	3.21	9.75	3553.71	222788	2.23	16316	1833474	0.0016	0.016	77.672					Accuracy (Relative Error, %) =	-5.876
HCQC urine	800	3.2	842.959	241816	201922	2.23	1164140	1666232	0.0015	1.1976	4808.55					HCQC
HCQC urine	800	3.2	787.741	249678	223073	2.23	1175665	1835947	0.0014	1.1193	3287.27					Mean =	793.518
HCQC urine	800	3.2	759.059	244625	226800	2.23	1150376	1869663	0.00135	1.0786	3405.93					Standard Deviation =	51.2637
HCQC urine	800	3.2	730.588	237855	229100	2.23	1112923	1900338	0.0013	1.0382	5793.25					Precision (Coefficient of Variation, %) =	6.46031
HCQC urine	800	3.2	847.244	244908	203471	2.23	1175352	1695364	0.0015	1.2037	3143.32					Accuracy (Relative Error, %) =	-0.810225
Post-preparative
Sample	Standard concentration (ng/mL)	RT	Concentration (ng/mL)	Analyte area	Internal standard area	IS RT	Height	IS Height	RRF	Response	Signal/Noise					Short-term temperature stability Precision (CV, %) and Accuracy (RE, %)
LCQC urine	10	3.19	9.861	3115.89	199655	2.23	14270	1625175	0.00156	0.0156	93.269					LCQC
LCQC urine	10	3.19	9.979	3380.06	214089	2.23	15997	1741745	0.00158	0.0158	80.196					Mean =	9.886
LCQC urine	10	3.2	10.905	3035.22	176366	2.23	14788	1445196	0.00172	0.0172	113.623					Standard Deviation =	0.738991
LCQC urine	10	3.19	9.865	2847.04	182349	2.23	13162	1504789	0.00156	0.0156	144.566					Precision (Coefficient of Variation, %) =	7.47513
LCQC urine	10	3.2	8.82	2978.25	212618	2.23	14330	1743900	0.0014	0.014	205.11					Accuracy (Relative Error, %) =	-1.14
HCQC urine	800	3.19	788.509	228157	188289	2.23	1061529	1559224	0.00151	1.2117	1941.93					HCQC
HCQC urine	800	3.19	779.003	216882	181167	2.23	1006655	1509397	0.0015	1.1971	4565.33					Mean =	786.934
HCQC urine	800	3.19	754.166	214188	184806	2.23	993764	1532684	0.00145	1.159	2697.17					Standard Deviation =	27.1792
HCQC urine	800	3.19	783.579	214733	178325	2.23	1001857	1482462	0.00151	1.2042	4251.73					Precision (Coefficient of Variation, %) =	3.45381
HCQC urine	800	3.19	829.413	242854	190537	2.23	1132556	1577967	0.00159	1.2746	3841.39					Accuracy (Relative Error, %) =	-1.63325

## Sheet: Cerebrospinal fluid validation
Cerebrospinal fluid validation
Matrix Effect
Sample	Standard concentration (ng/mL)	RT	Concentration (ng/mL)	Analyte area	Internal standard area	IS RT	Height	IS Height	RRF	Response	Signal/Noise		Analyte area / internal standard area	Matrix Factor Normalized by Internal Standard		Matrix Factor Normalized by Internal Standard
LCQC cerebrospinal fluid (normal #1)	0.25	3.37	0.245	2119.94	182807	2.92	7928	1243248	0.04639	0.0116	177.084		0.0115966	1.1435		Mean =	1.13986
LCQC cerebrospinal fluid (normal #2)	0.25	3.36	0.252	2251.34	189665	2.92	8937	1307718	0.04748	0.0119	87.869		0.0118701	1.17046		Standard Deviation =	0.0997462
LCQC cerebrospinal fluid (normal #3)	0.25	3.38	0.257	2315.47	191335	2.92	8892	1322255	0.04841	0.0121	89.873		0.0121016	1.1933		Coefficient of Variation (%) =	8.75075
LCQC cerebrospinal fluid (normal #4)	0.25	3.38	0.278	2538.25	196445	2.92	9819	1359182	0.05168	0.0129	128.601		0.0129209	1.27408
LCQC cerebrospinal fluid (yellowish-turbid #1)	0.25	3.36	0.281	2497.26	191294	2.92	9655	1290022	0.05222	0.0131	312.24		0.0130545	1.28726
LCQC cerebrospinal fluid (yellowish-turbid #2)	0.25	3.37	0.27	2499.27	198102	2.92	9645	1365550	0.05046	0.0126	111.392		0.0126161	1.24402
LCQC cerebrospinal fluid (with blood #1)	0.25	3.36	0.256	2511.09	208851	2.92	9760	1440621	0.04809	0.012	45.628		0.0120234	1.18558
LCQC cerebrospinal fluid (with blood #2)	0.25	3.36	0.284	2524.57	191495	2.92	9666	1255754	0.05273	0.0132	197.374		0.0131835	1.29997
LCQC solution	0.25	3.51	0.199	2073.32	212981	2.92	7473	1435136	0.03894	0.0097	93.21		0.00973476
LCQC solution	0.25	3.51	0.176	2156.07	245155	2.92	7819	1649272	0.03518	0.0088	57.094		0.00879471
LCQC solution	0.25	3.5	0.252	2917.84	245309	2.92	9997	1645316	0.04758	0.0119	49.962		0.0118946
HCQC cerebrospinal fluid (normal #1)	200	3.34	208.724	1.88271e+06	222411	2.92	7287936	1539707	0.04232	8.465	15107.1		8.46499	1.08531
HCQC cerebrospinal fluid (normal #2)	200	3.34	212.925	1.88214e+06	217958	2.91	7298765	1506123	0.04318	8.6353	185302		8.63533	1.10715
HCQC cerebrospinal fluid (normal #3)	200	3.36	201.765	1.76475e+06	215664	2.92	6746269	1479244	0.04091	8.1828	49786.4		8.18285	1.04914
HCQC cerebrospinal fluid (normal #4)	200	3.34	208.548	1.81659e+06	214780	2.91	7006310	1496955	0.04229	8.4579	112323		8.45789	1.0844
HCQC cerebrospinal fluid (yellowish-turbid #1)	200	3.33	201.6	1.73548e+06	212261	2.92	6699686	1446729	0.04088	8.1761	8407.03		8.17614	1.04828
HCQC cerebrospinal fluid (yellowish-turbid #2)	200	3.35	190.943	1.65631e+06	213882	2.92	6344795	1493553	0.03872	7.744	76767.3		7.74404	0.992877
HCQC cerebrospinal fluid (with blood #1)	200	3.34	201.562	1.85962e+06	227487	2.92	7160383	1574649	0.04087	8.1746	108766		8.17459	1.04808
HCQC cerebrospinal fluid (with blood #2)	200	3.35	196.992	1.79385e+06	224531	2.92	6989058	1544577	0.03995	7.9893	33867.3		7.9893	1.02432
HCQC solution	200	3.5	186.063	1.93823e+06	256849	2.92	6808451	1758271	0.03773	7.5462	134410		7.54616
HCQC solution	200	3.5	197.73	2.0264e+06	252693	2.92	7100332	1736783	0.0401	8.0192	7100332		8.0192
HCQC solution	200	3.5	193.148	2.02689e+06	258749	2.92	7081589	1772884	0.03917	7.8334	114746		7.83343
Precision and Accuracy
Within-run
Sample	Standard concentration (ng/mL)	RT	Concentration (ng/mL)	Analyte area	Internal standard area	IS RT	Height	IS Height	RRF	Response	Signal/Noise					Within-run Precision (CV, %) and Accuracy (RE, %)
Run 1 – LLOQQC cerebrospinal fluid	0.1	3.37	0.107	897.72	155314	2.92	3110	1088376	0.0578	0.0058	24.912					LLOQQC
Run 1 – LLOQQC cerebrospinal fluid	0.1	3.37	0.099	780.23	144974	2.92	2971	1020555	0.05382	0.0054	105.99					Mean =	0.1068
Run 1 – LLOQQC cerebrospinal fluid	0.1	3.35	0.107	853.74	147846	2.92	3185	1030587	0.05775	0.0058	67.751					Standard Deviation =	0.00531037
Run 1 – LLOQQC cerebrospinal fluid	0.1	3.38	0.107	825.6	142661	2.92	2969	1001540	0.05787	0.0058	46.436					Precision (Coefficient of Variation, %) =	4.97225
Run 1 – LLOQQC cerebrospinal fluid	0.1	3.36	0.114	848.86	139050	2.92	2909	983692	0.06105	0.0061	52.554					Accuracy (Relative Error, %) =	6.8
Run 1 – LCQC cerebrospinal fluid	0.25	3.37	0.262	1840.81	138819	2.92	6821	970982	0.05304	0.0133	74.294					LCQC
Run 1 – LCQC cerebrospinal fluid	0.25	3.36	0.266	1995.49	148131	2.92	6990	1025607	0.05388	0.0135	70.529					Mean =	0.2656
Run 1 – LCQC cerebrospinal fluid	0.25	3.35	0.265	1765.95	131806	2.92	6562	916442	0.05359	0.0134	134.759					Standard Deviation =	0.00250998
Run 1 – LCQC cerebrospinal fluid	0.25	3.35	0.266	2026.03	150577	2.92	7311	1056034	0.05382	0.0135	41.358					Precision (Coefficient of Variation, %) =	0.945023
Run 1 – LCQC cerebrospinal fluid	0.25	3.38	0.269	1950.58	143163	2.92	6746	997603	0.0545	0.0136	121.6					Accuracy (Relative Error, %) =	6.24
Run 1 – MCQC cerebrospinal fluid	125	3.36	123.21	869536	145825	2.92	3182031	1034762	0.0477	5.9629	16173.8					MCQC
Run 1 – MCQC cerebrospinal fluid	125	3.35	120.719	877517	150200	2.92	3222955	1056370	0.04674	5.8423	34166.1					Mean =	120.101
Run 1 – MCQC cerebrospinal fluid	125	3.35	120.379	860217	147654	2.92	3147275	1021908	0.04661	5.8259	36881.2					Standard Deviation =	2.1486
Run 1 – MCQC cerebrospinal fluid	125	3.35	118.505	829559	144643	2.92	3040857	1010307	0.04588	5.7352	13291.9					Precision (Coefficient of Variation, %) =	1.78899
Run 1 – MCQC cerebrospinal fluid	125	3.35	117.694	826816	145158	2.92	3039012	1010906	0.04557	5.696	2739.59					Accuracy (Relative Error, %) =	-3.91888
Run 1 – HCQC cerebrospinal fluid	200	3.35	190.87	1.40719e+06	152342	2.92	5130298	1060748	0.04619	9.2371	24754.1					HCQC
Run 1 – HCQC cerebrospinal fluid	200	3.35	197.627	1.36405e+06	142623	2.91	4950134	1005983	0.04782	9.564	120113					Mean =	195.389
Run 1 – HCQC cerebrospinal fluid	200	3.35	194.881	1.42224e+06	150802	2.91	5172049	1059913	0.04716	9.4311	5172049					Standard Deviation =	2.72807
Run 1 – HCQC cerebrospinal fluid	200	3.34	196.479	1.3726e+06	144356	2.92	4986614	1005220	0.04754	9.5085	53416.2					Precision (Coefficient of Variation, %) =	1.39622
Run 1 – HCQC cerebrospinal fluid	200	3.34	197.09	1.41089e+06	147922	2.91	5136633	1030510	0.04769	9.5381	166047					Accuracy (Relative Error, %) =	-2.3053
Between-run
Sample	Standard concentration (ng/mL)	RT	Concentration (ng/mL)	Analyte area	Internal standard area	IS RT	Height	IS Height	RRF	Response	Signal/Noise					Between-run Precision (CV, %) and Accuracy (RE, %)
Run 1 – LLOQQC cerebrospinal fluid	0.1	3.37	0.107	897.72	155314	2.92	3110	1088376	0.0578	0.0058	24.912					LLOQQC
Run 1 – LLOQQC cerebrospinal fluid	0.1	3.37	0.099	780.23	144974	2.92	2971	1020555	0.05382	0.0054	105.99					Mean =	0.0999333
Run 1 – LLOQQC cerebrospinal fluid	0.1	3.35	0.107	853.74	147846	2.92	3185	1030587	0.05775	0.0058	67.751					Standard Deviation =	0.00661672
Run 1 – LLOQQC cerebrospinal fluid	0.1	3.38	0.107	825.6	142661	2.92	2969	1001540	0.05787	0.0058	46.436					Precision (Coefficient of Variation, %) =	6.62113
Run 1 – LLOQQC cerebrospinal fluid	0.1	3.36	0.114	848.86	139050	2.92	2909	983692	0.06105	0.0061	52.554					Accuracy (Relative Error, %) =	-0.0666667
Run 2 – LLOQQC cerebrospinal fluid	0.1	3.38	0.1	881.51	156850	2.93	3435	1071084	0.0562	0.0056	45.606
Run 2 – LLOQQC cerebrospinal fluid	0.1	3.39	0.095	853.22	157208	2.93	3265	1078091	0.05427	0.0054	52.727
Run 2 – LLOQQC cerebrospinal fluid	0.1	3.41	0.095	840.84	155572	2.92	3211	1070933	0.05405	0.0054	89.078
Run 2 – LLOQQC cerebrospinal fluid	0.1	3.38	0.098	840.66	151672	2.92	3219	1043318	0.05543	0.0055	32.542
Run 2 – LLOQQC cerebrospinal fluid	0.1	3.39	0.102	892.75	156138	2.92	3527	1081342	0.05718	0.0057	43.256
Run 3 – LLOQQC cerebrospinal fluid	0.1	3.41	0.103	935.02	146146	2.93	3504	978385	0.06398	0.0064	94.993
Run 3 – LLOQQC cerebrospinal fluid	0.1	3.39	0.092	874.86	148854	2.93	3430	997131	0.05877	0.0059	46.558
Run 3 – LLOQQC cerebrospinal fluid	0.1	3.38	0.092	854.2	146107	2.93	3929	986751	0.05846	0.0058	44.101
Run 3 – LLOQQC cerebrospinal fluid	0.1	3.39	0.095	869.24	144560	2.93	3511	967136	0.06013	0.006	69.614
Run 3 – LLOQQC cerebrospinal fluid	0.1	3.39	0.093	900.11	152311	2.93	3549	1019601	0.0591	0.0059	80.305
Run 1 – LCQC cerebrospinal fluid	0.25	3.37	0.262	1840.81	138819	2.92	6821	970982	0.05304	0.0133	74.294					LCQC
Run 1 – LCQC cerebrospinal fluid	0.25	3.36	0.266	1995.49	148131	2.92	6990	1025607	0.05388	0.0135	70.529					Mean =	0.264
Run 1 – LCQC cerebrospinal fluid	0.25	3.35	0.265	1765.95	131806	2.92	6562	916442	0.05359	0.0134	134.759					Standard Deviation =	0.00609449
Run 1 – LCQC cerebrospinal fluid	0.25	3.35	0.266	2026.03	150577	2.92	7311	1056034	0.05382	0.0135	41.358					Precision (Coefficient of Variation, %) =	2.30852
Run 1 – LCQC cerebrospinal fluid	0.25	3.38	0.269	1950.58	143163	2.92	6746	997603	0.0545	0.0136	121.6					Accuracy (Relative Error, %) =	5.6
Run 2 – LCQC cerebrospinal fluid	0.25	3.38	0.251	1855.52	150476	2.92	7501	1036515	0.04932	0.0123	123.277
Run 2 – LCQC cerebrospinal fluid	0.25	3.38	0.253	1756.94	141449	2.92	6621	985102	0.04968	0.0124	117.536
Run 2 – LCQC cerebrospinal fluid	0.25	3.38	0.266	2043.01	157214	2.92	7766	1078393	0.05198	0.013	198.627
Run 2 – LCQC cerebrospinal fluid	0.25	3.38	0.26	2012.2	157881	2.92	7341	1087472	0.05098	0.0127	128.767
Run 2 – LCQC cerebrospinal fluid	0.25	3.38	0.258	1984.76	156881	2.92	8061	1075106	0.05061	0.0127	121.22
Run 3 – LCQC cerebrospinal fluid	0.25	3.38	0.27	2105.41	141910	2.92	8180	960479	0.05934	0.0148	124.683
Run 3 – LCQC cerebrospinal fluid	0.25	3.38	0.269	2108.35	142421	2.92	8491	960095	0.05921	0.0148	121.313
Run 3 – LCQC cerebrospinal fluid	0.25	3.37	0.271	2076.52	139395	2.92	8447	940304	0.05959	0.0149	250.197
Run 3 – LCQC cerebrospinal fluid	0.25	3.39	0.265	1996.71	136962	2.92	7667	914235	0.05831	0.0146	59.6
Run 3 – LCQC cerebrospinal fluid	0.25	3.37	0.269	2048.76	138426	2.92	8027	941141	0.0592	0.0148	100.316
Run 1 – MCQC cerebrospinal fluid	125	3.36	123.21	869536	145825	2.92	3182031	1034762	0.0477	5.9629	16173.8					MCQC
Run 1 – MCQC cerebrospinal fluid	125	3.35	120.719	877517	150200	2.92	3222955	1056370	0.04674	5.8423	34166.1					Mean =	121.994
Run 1 – MCQC cerebrospinal fluid	125	3.35	120.379	860217	147654	2.92	3147275	1021908	0.04661	5.8259	36881.2					Standard Deviation =	3.26409
Run 1 – MCQC cerebrospinal fluid	125	3.35	118.505	829559	144643	2.92	3040857	1010307	0.04588	5.7352	13291.9					Precision (Coefficient of Variation, %) =	2.67561
Run 1 – MCQC cerebrospinal fluid	125	3.35	117.694	826816	145158	2.92	3039012	1010906	0.04557	5.696	2739.59					Accuracy (Relative Error, %) =	-2.40443
Run 2 – MCQC cerebrospinal fluid	125	3.38	119.538	794503	149598	2.93	3067358	1031923	0.04249	5.3109	176149
Run 2 – MCQC cerebrospinal fluid	125	3.38	126.486	864993	153926	2.92	3337574	1052008	0.04496	5.6195	43417.4
Run 2 – MCQC cerebrospinal fluid	125	3.38	124.008	848748	154053	2.92	3276716	1051412	0.04408	5.5095	60102.2
Run 2 – MCQC cerebrospinal fluid	125	3.38	121.987	850338	156898	2.92	3283619	1069496	0.04336	5.4197	22352.5
Run 2 – MCQC cerebrospinal fluid	125	3.38	127.185	839511	148570	2.92	3238838	1017415	0.0452	5.6506	78714.8
Run 3 – MCQC cerebrospinal fluid	125	3.39	122.404	872262	141305	2.93	3549781	918239	0.04938	6.1729	9065.57
Run 3 – MCQC cerebrospinal fluid	125	3.39	126.344	928113	145665	2.93	3774460	968048	0.05097	6.3716	35255.1
Run 3 – MCQC cerebrospinal fluid	125	3.39	123.445	902709	145005	2.93	3668134	962625	0.0498	6.2254	30910.5
Run 3 – MCQC cerebrospinal fluid	125	3.38	121.881	832648	135467	2.92	3388103	897373	0.04917	6.1465	27245.4
Run 3 – MCQC cerebrospinal fluid	125	3.39	116.132	873839	149204	2.92	3553487	990991	0.04685	5.8567	20848.5
Run 1 – HCQC cerebrospinal fluid	200	3.35	190.87	1.40719e+06	152342	2.92	5130298	1060748	0.04619	9.2371	24754.1					HCQC
Run 1 – HCQC cerebrospinal fluid	200	3.35	197.627	1.36405e+06	142623	2.91	4950134	1005983	0.04782	9.564	120113					Mean =	183.618
Run 1 – HCQC cerebrospinal fluid	200	3.35	194.881	1.42224e+06	150802	2.91	5172049	1059913	0.04716	9.4311	5172049					Standard Deviation =	9.89243
Run 1 – HCQC cerebrospinal fluid	200	3.34	196.479	1.3726e+06	144356	2.92	4986614	1005220	0.04754	9.5085	53416.2					Precision (Coefficient of Variation, %) =	5.38752
Run 1 – HCQC cerebrospinal fluid	200	3.34	197.09	1.41089e+06	147922	2.91	5136633	1030510	0.04769	9.5381	166047					Accuracy (Relative Error, %) =	-8.19123
Run 2 – HCQC cerebrospinal fluid	200	3.38	174.293	1201531	155175	2.92	4623412	1058933	0.03872	7.7431	14299.2
Run 2 – HCQC cerebrospinal fluid	200	3.37	173.583	1.26265e+06	163736	2.92	4862521	1122893	0.03856	7.7115	19156
Run 2 – HCQC cerebrospinal fluid	200	3.37	172.324	1.29919e+06	169705	2.92	5001443	1172919	0.03828	7.6556	18622.1
Run 2 – HCQC cerebrospinal fluid	200	3.37	176.436	1248947	159340	2.92	4783233	1096341	0.03919	7.8383	46527.3
Run 2 – HCQC cerebrospinal fluid	200	3.37	176.908	1.24259e+06	158106	2.92	4768445	1083157	0.0393	7.8592	21184
Run 3 – HCQC cerebrospinal fluid	200	3.38	179.818	1.31254e+06	144748	2.92	5309745	977129	0.04534	9.0678	115451
Run 3 – HCQC cerebrospinal fluid	200	3.38	175.433	1.32088e+06	149308	2.92	5338936	1016834	0.04423	8.8466	161666
Run 3 – HCQC cerebrospinal fluid	200	3.38	185.278	1.33529e+06	142919	2.93	5390910	967158	0.04672	9.343	25244
Run 3 – HCQC cerebrospinal fluid	200	3.38	190.091	1.34702e+06	140524	2.93	5429634	948106	0.04793	9.5857	27953.9
Run 3 – HCQC cerebrospinal fluid	200	3.38	173.152	1.30201e+06	149114	2.93	5243082	1009031	0.04366	8.7316	30892.9
Stabilities
Freeze and thaw
Sample	Standard concentration (ng/mL)	RT	Concentration (ng/mL)	Analyte area	Internal standard area	IS RT	Height	IS Height	RRF	Response	Signal/Noise					Freeze and thaw stability Precision (CV, %) and Accuracy (RE, %)
LCQC cerebrospinal fluid	0.25	3.33	0.276	1769.27	143998	2.92	6285	1032945	0.04915	0.0123	141.777					LCQC
LCQC cerebrospinal fluid	0.25	3.32	0.246	1654.04	149052	2.92	6209	1069940	0.04439	0.0111	110.453					Mean =	0.2592
LCQC cerebrospinal fluid	0.25	3.31	0.253	1585.76	139411	2.92	5856	999229	0.0455	0.0114	193.76					Standard Deviation =	0.0123572
LCQC cerebrospinal fluid	0.25	3.29	0.268	1618.13	134993	2.9	5819	969819	0.04795	0.012	56.564					Precision (Coefficient of Variation, %) =	4.76743
LCQC cerebrospinal fluid	0.25	3.3	0.253	1541.57	135586	2.9	5857	971092	0.04548	0.0114	128.569					Accuracy (Relative Error, %) =	3.68
HCQC cerebrospinal fluid	200	3.3	200.545	1.16632e+06	144656	2.9	4369504	1054031	0.04031	8.0627	21635.6					HCQC
HCQC cerebrospinal fluid	200	3.32	222.183	1265693	141695	2.92	4617413	1022720	0.04466	8.9325	74785.7					Mean =	215.427
HCQC cerebrospinal fluid	200	3.3	219.972	1.21684e+06	137594	2.92	4486330	985841	0.04422	8.8436	30135.2					Standard Deviation =	9.20271
HCQC cerebrospinal fluid	200	3.3	221.939	1272774	142644	2.92	4667951	1017476	0.04461	8.9227	4667951					Precision (Coefficient of Variation, %) =	4.27184
HCQC cerebrospinal fluid	200	3.29	212.498	1.20566e+06	141125	2.92	4425610	1009826	0.04272	8.5432	18905					Accuracy (Relative Error, %) =	7.7137
Short-term temperature
Sample	Standard concentration (ng/mL)	RT	Concentration (ng/mL)	Analyte area	Internal standard area	IS RT	Height	IS Height	RRF	Response	Signal/Noise					Short-term temperature stability Precision (CV, %) and Accuracy (RE, %)
LCQC cerebrospinal fluid	0.3	3.3	0.307	1971.32	143330	2.92	6840	1019314	0.04585	0.0138	118.222					LCQC
LCQC cerebrospinal fluid	0.3	3.29	0.291	1842.29	140420	2.92	6980	997542	0.04373	0.0131	107.73					Mean =	0.3046
LCQC cerebrospinal fluid	0.3	3.3	0.313	1885.53	134752	2.92	6628	961706	0.04664	0.014	38.226					Standard Deviation =	0.00991464
LCQC cerebrospinal fluid	0.3	3.29	0.314	1922.77	137060	2.92	7049	974900	0.04676	0.014	95.369					Precision (Coefficient of Variation, %) =	3.25497
LCQC cerebrospinal fluid	0.3	3.28	0.298	1805.9	134725	2.92	6203	960174	0.04468	0.0134	72.604					Accuracy (Relative Error, %) =	1.53333
HCQC cerebrospinal fluid	200	3.28	196.857	1.16397e+06	145956	2.92	4224367	1039532	0.03987	7.9748	20914.9					HCQC
HCQC cerebrospinal fluid	200	3.27	201.056	1.13264e+06	139062	2.92	4096436	992548	0.04072	8.1448	38861.1					Mean =	196.491
HCQC cerebrospinal fluid	200	3.27	195.311	1.1233e+06	141972	2.92	4071188	1009808	0.03956	7.9122	38727.7					Standard Deviation =	2.71996
HCQC cerebrospinal fluid	200	3.28	194.922	1.04669e+06	132553	2.92	3750327	925103	0.03948	7.8964	8629.47					Precision (Coefficient of Variation, %) =	1.38427
HCQC cerebrospinal fluid	200	3.27	194.308	1.10552e+06	140446	2.91	3997303	986252	0.03936	7.8715	35781.7					Accuracy (Relative Error, %) =	-1.7546
Post-preparative
Sample	Standard concentration (ng/mL)	RT	Concentration (ng/mL)	Analyte area	Internal standard area	IS RT	Height	IS Height	RRF	Response	Signal/Noise					Short-term temperature stability Precision (CV, %) and Accuracy (RE, %)
LCQC cerebrospinal fluid	0.25	3.36	0.242	1980.09	147687	2.92	6855	1062524	0.05363	0.0134	132.727					LCQC
LCQC cerebrospinal fluid	0.25	3.36	0.237	1987.45	151104	2.92	6761	1074169	0.05261	0.0132	54.825					Mean =	0.242
LCQC cerebrospinal fluid	0.25	3.34	0.254	1996.8	142793	2.92	6928	1015342	0.05594	0.014	81.167					Standard Deviation =	0.00738241
LCQC cerebrospinal fluid	0.25	3.34	0.235	1954.83	150054	2.92	7143	1067822	0.05211	0.013	66.991					Precision (Coefficient of Variation, %) =	3.05058
LCQC cerebrospinal fluid	0.25	3.35	0.242	2121.9	158425	2.93	7291	1128960	0.05358	0.0134	48.527					Accuracy (Relative Error, %) =	-3.2
HCQC cerebrospinal fluid	200	3.34	177.376	1.39631e+06	155785	2.92	5033850	1114455	0.04482	8.963	20540.3					HCQC
HCQC cerebrospinal fluid	200	3.33	182.101	1.34223e+06	145866	2.91	4815089	1053253	0.04601	9.2018	47935.1					Mean =	181.153
HCQC cerebrospinal fluid	200	3.33	178.433	1.37103e+06	152059	2.91	4923058	1107278	0.04508	9.0164	259531					Standard Deviation =	3.10033
HCQC cerebrospinal fluid	200	3.33	183.436	1.35365e+06	146037	2.91	4860836	1064602	0.04635	9.2692	159519					Precision (Coefficient of Variation, %) =	1.71144
HCQC cerebrospinal fluid	200	3.34	184.42	1.43534e+06	154025	2.92	5171708	1113706	0.04659	9.3189	68403.5					Accuracy (Relative Error, %) =	-9.4234

## Sheet: Samples quantification
Samples quantification
Plasma
Sample	RT	Concentration (ng/mL)	Analyte area	Internal standard area	IS RT	Height	IS Height	RRF	Response	Signal/Noise
Patient Day8 – plasma	3.06	375.605	32423	106782	3.11	149168	723718	0	0.3	702.941
Patient Day15 – plasma	3.06	337.761	29543	108180	3.12	137693	731886	0	0.27	427.615
Patient Phase1 T0 – plasma	3.04	188.623	32423	513117	3.12	142782	3464643	0	0.06	515.679
Patient Phase1 T1 – plasma	3.03	383.494	57505	448043	3.11	244371	3202345	0	0.13	958.195
Patient Phase1 T2 – plasma	3.03	402.429	57121	424124	3.11	250818	2916601	0	0.13	1370.44
Patient Phase1 T3 – plasma	3.03	313.986	53295	507061	3.11	224147	3496778	0	0.11	604.312
Patient Phase1 T4 – plasma	3.03	276.413	43872	474072	3.11	191305	3273504	0	0.09	700.02
Patient Phase1 T5 – plasma	3.04	260.493	42544	487775	3.11	192037	3351884	0	0.09	691.196
Patient Phase1 T6 – plasma	3.04	212.38	37683	529756	3.11	163469	3631330	0	0.07	702.5
Patient Phase1 T7 – plasma	3.05	178.035	29665	497326	3.11	129674	3443749	0	0.06	675.988
Patient Phase1 T8 – plasma	3.05	190.918	31257	488730	3.1	134300	3374551	0	0.06	756.548
Patient Phase1 T9 – plasma	3.05	194.723	32210	493800	3.11	139147	3434580	0	0.07	520.326
Patient Phase1 T10 – plasma	3.05	182.275	32228	527755	3.1	141730	3634084	0	0.06	849.274
Patient Phase1 T11 – plasma	3.05	190.742	32386	506850	3.1	143538	3561209	0	0.06	649.912
Patient Phase2 T0 – plasma	3.06	290.246	40601	417845	3.1	183090	2943139	0	0.1	1474.99
Patient Phase2 T1 – plasma	3.06	389.863	67662	518576	3.1	299471	3653559	0	0.13	1270.77
Patient Phase2 T2 – plasma	3.07	820.024	143296	522386	3.11	621960	3680787	0	0.27	2606.33
Patient Phase2 T3 – plasma	3.06	438.573	74482	507496	3.1	320637	3583897	0	0.15	1670.33
Patient Phase2 T4 – plasma	3.05	415.123	67174	483530	3.1	293114	3415799	0	0.14	1217.5
Patient Phase2 T5 – plasma	3.06	328.696	54970	499612	3.1	243496	3507331	0	0.11	1015.97
Patient Phase2 T6 – plasma	3.06	344.718	58287	505167	3.1	255356	3569577	0	0.12	595.968
Patient Phase2 T7 – plasma	3.06	331.943	51393	462542	3.1	227259	3269939	0	0.11	794.282
Patient Phase2 T8 – plasma	3.07	326.861	54925	502005	3.1	241498	3532138	0	0.11	98.457
Patient Phase2 T9 – plasma	3.06	306.938	52880	514653	3.1	231587	3615279	0	0.1	1149.12
Patient Phase2 T10 – plasma	3.07	293.449	47092	479358	3.1	208552	3333351	0	0.1	1082.13
Plasma ultrafiltrate
Sample	RT	Concentration (ng/mL)	Analyte area	Internal standard area	IS RT	Height	IS Height	RRF	Response	Signal/Noise
Patient Day8 – plasma ultrafiltrate	3.07	9.458	7271	488328	3.12	35843	3595369	0	1.49	169.911
Patient Day15 – plasma ultrafiltrate	3.08	8.147	6326	493827	3.12	32069	3623712	0	1.28	124
Patient Phase1 T7 – plasma ultrafiltrate	3.05	5.246	3862	470393	3.12	17858	3479904	0	0.82	131.94
Patient Phase1 T8 – plasma ultrafiltrate	3.04	5.937	4625	496993	3.13	22160	3683546	0	0.93	184.058
Patient Phase1 T9 – plasma ultrafiltrate	3.08	6.512	4781	467902	3.13	24220	3461921	0	1.02	157.248
Patient Phase1 T10 – plasma ultrafiltrate	3.06	6.401	4649	463002	3.12	23367	3439795	0	1	190.291
Patient Phase1 T11 – plasma ultrafiltrate	3.09	6.403	4709	468868	3.12	20975	3464084	0	1	299.798
Patient Phase2 T6 – plasma ultrafiltrate	3.07	9.157	7106	493055	3.12	34070	3658025	0	1.44	299.617
Patient Phase2 T7 – plasma ultrafiltrate	3.07	9.82	7365	476261	3.12	33417	3534143	0	1.55	317.4
Patient Phase2 T8 – plasma ultrafiltrate	3.06	9.435	7079	476613	3.12	34751	3532797	0	1.49	33.297
Patient Phase2 T9 – plasma ultrafiltrate	3.07	10.399	7408	452215	3.12	35657	3364609	0	1.64	117.394
Patient Phase2 T10 – plasma ultrafiltrate	3.1	9.005	6270	442466	3.12	29314	3266939	0	1.42	143.295
Urine
Sample	RT	Concentration (ng/mL)	Analyte area	Internal standard area	IS RT	Height	IS Height	RRF	Response	Signal/Noise
Patient Phase1 Fraction1 – urine	3.19	91.887	23735	426827	3.14	111730	2960733	0	0.06	708.436
Patient Phase1 Fraction2 – urine	3.19	63.876	16670	432200	3.13	78071	2988617	0	0.04	333.969
Patient Phase1 Fraction3 – urine	3.15	234.813	52083	365379	3.14	236683	2510110	0	0.14	1295.16
Patient Phase1 Fraction4 – urine	3.14	249.504	59781	394637	3.14	268570	2704844	0	0.15	650.554
Patient Phase1 Fraction5 – urine	3.1	280.753	56096	329027	3.13	245194	2324789	0	0.17	916.471
Patient Phase1 Fraction6 – urine	3.08	695.771	123546	292117	3.13	529897	2055658	0	0.42	477.58
Patient Phase1 Fraction7 – urine	3.05	1019.37	143048	230809	3.13	599448	1647614	0	0.62	1014.73
Patient Phase1 Fraction8 – urine	3.02	381.91	54341	234207	3.13	221359	1665908	0	0.23	411.894
Patient Phase1 Fraction9 – urine	3.01	1153.57	154884	220822	3.13	617437	1567769	0	0.7	629.797
Patient Phase1 Fraction10 – urine	3.05	248.046	38984	258863	3.13	157797	1830447	0	0.15	534.624
Patient Phase2 Fraction1 – urine	3.17	278.292	56157	332302	3.13	256714	2318010	0	0.17	675.505
Patient Phase2 Fraction2 – urine	3.19	162.886	40941	414399	3.13	192188	2896236	0	0.1	781.238
Patient Phase2 Fraction3 – urine	3.17	223.89	56419	415143	3.13	256671	2889337	0	0.14	334.117
Patient Phase2 Fraction4 – urine	3.14	249.857	64185	423113	3.13	287414	2934346	0	0.15	1864.94
Patient Phase2 Fraction5 – urine	3.17	234.282	47019	330597	3.13	216881	2316358	0	0.14	1775.87
Patient Phase2 Fraction6 – urine	3.19	114.018	24282	351549	3.13	113521	2449157	0	0.07	331.021
Patient Phase2 Fraction7 – urine	3.19	73.111	18505	418769	3.14	84983	2889760	0	0.04	396.778
Patient Phase2 Fraction8 – urine	3.2	20.083	2585	216666	3.14	12675	1522782	0	0.01	97.185
Patient Phase2 Fraction9 – urine	3.19	66.826	8792	217804	3.14	40270	1527399	0	0.04	164.821
Patient Phase2 Fraction10 – urine	3.17	98.33	24167	405981	3.13	115488	2817853	0	0.06	738.919
Patient Phase2 Fraction11 – urine	3.17	81.922	20582	415401	3.13	96433	2880222	0	0.05	808.425
Patient Phase2 Fraction12 – urine	3.12	132.459	30901	384879	3.13	137325	2682983	0	0.08	441.325
Patient Phase2 Fraction13 – urine	3.13	81.125	23388	476705	3.13	105286	3323681	0	0.05	748.515
Patient Phase2 Fraction14 – urine	3.1	244.274	39617	267139	3.12	174199	1868957	0	0.15	219.355
Patient Phase2 Fraction15 – urine	3.17	45.632	11020	401123	3.13	50052	2789891	0	0.03	184.711
Patient Phase2 Fraction16 – urine	3.14	83.442	21361	423216	3.13	96325	2951719	0	0.05	678.365
Patient Phase2 Fraction17 – urine	3.07	217.546	37374	283047	3.12	159416	1981027	0	0.13	739.418
Patient Phase1 Fraction7 dilution – urine	3.05	60.462	7749	254475	3.12	31275	1764776	0	0.03	140.679
Patient Phase1 Fraction7 dilution – urine	3.05	55.863	5646	200904	3.12	23277	1406832	0	0.03	110.305
Patient Phase1 Fraction7 dilution – urine	3.06	62.58	7564	239866	3.12	32514	1671095	0	0.03	60.774
Patient Phase1 Fraction9 dilution – urine	3.04	33.695	4276	254731	3.12	17891	1757613	0	0.02	84.38
Patient Phase1 Fraction9 dilution – urine	3.04	40.874	5061	247443	3.12	22158	1730767	0	0.02	87.621
Patient Phase1 Fraction9 dilution – urine	3.05	48.287	5823	240247	3.12	24790	1666894	0	0.02	163.319
Cerebrospinal fluid
Sample	RT	Concentration (ng/mL)	Analyte area	Internal standard area	IS RT	Height	IS Height	RRF	Response	Signal/Noise
Patient Day8 – cerebrospinal fluid	3.02	12.449	6990	125049	3.1	30732	846633	0	0.06	144.386
Patient Day15 – cerebrospinal fluid	3.02	17.985	9262	114089	3.1	41756	763271	0	0.08	281.591
